# Supplementary material
Source: PubMed Central journal article supplement (PMC6537838)
Supplement: jamapsychiatry-76-948-s001.pdf [file jamapsychiatry-76-948-s001.pdf]

## Supplementary Online Content

Sheehy O, Zhao J-P, Bérard A. Association between incident exposure to benzodiazepines in early pregnancy and the risk of spontaneous abortion. *JAMA Psychiatry*. Published online May 15, 2019. doi:10.1001/jamapsychiatry.2019.0963

**eTable 1.** List of Known Fetotoxic Prescribed Medications Excluded

**eTable 2.** List of Diagnostic Codes (*ICD-9* and *ICD-10*) and Medications Used for the Covariates

**eTable 3.** Number of Prescription Filled During Early Pregnancy by Pregnancy

**eTable 4.** Distribution of the Number of Pregnancies Exposed to Specific Benzodiazepine Agents

**eTable 5.** Distribution of Duration of Prescriptions Filled and Quantity of Pills Dispensed by Benzodiazepine Specific Agents

**eTable 6.** Association Between Short and Long-acting Benzodiazepine Incident Exposure During Early Pregnancy and the Risk of Spontaneous Abortion

**eTable 7.** Association Between Mean Daily Dose of Benzodiazepine Incident Exposure During Early Pregnancy and the Risk of Spontaneous Abortion

**eMethods.** Sensitivity Analyses

**eTable 8.** Association Between Benzodiazepine Incident Exposure During Early Pregnancy and the Risk of Spontaneous Abortion With the Variable Prior Pregnancy Categorized by Termination (Childbirth, Planned/Induced Abortion, Spontaneous Abortion)

**eTable 9.** Association Between Benzodiazepine Incident Exposure During Early Pregnancy and the Risk of Spontaneous Abortion Among Women With Mood and Anxiety Disorders Diagnosis in the 12 Months Before LMP Until Index Date

**eTable 10.** Association Between Benzodiazepine Incident Exposure During Early Pregnancy and the Risk of Spontaneous Abortion With Pregnancies of Women With Only 1 Prescription Filled Prior to Pregnancy Who Overlap the LMP Considered as Unexposed

**eTable 11.** Association Between Benzodiazepine Incident Exposure During Early Pregnancy and the Risk of Spontaneous Abortion With Only Pregnancies of Women Who Filled 2 or More Prescription of Benzodiazepine Were Considered as Exposed

**eTable 12.** Association Between Benzodiazepine Incident Exposure During Early Pregnancy and the Risk of Spontaneous Abortion Removing Benzodiazepine Prescription Filled in the 7 Days Prior to the Index Date (Date of the Spontaneous Abortion)

**eTable 13.** Association Between Benzodiazepine Incident Exposure During Early Pregnancy and the Risk of Spontaneous Abortion With the General Practitioner Visits Dichotomized Regarding the Purpose of Consultation (Mental Disorders vs. Other Disorders)

**eTable 14.** Association Between Benzodiazepine Incident Exposure During Early Pregnancy and the Risk of Spontaneous Abortion With the New Definition of Mood and

Anxiety Disorder Proposed by the Canadian Chronic Disease Surveillance System  
(CCDSS)

This supplementary material has been provided by the authors to give readers additional information about their work.

**eTable 1.** List of Known Fetotoxic Medications Excluded

| <b>Class</b>                                          | <b>Denomination commune</b>                                                                                                                                                                                                                                                                                                                                                                        |
|-------------------------------------------------------|----------------------------------------------------------------------------------------------------------------------------------------------------------------------------------------------------------------------------------------------------------------------------------------------------------------------------------------------------------------------------------------------------|
| <b>systemic retinoids</b>                             | isotretinoin, acitretin, etretinate, tretinoin (retinoic acid), retinol, retinal, adapalene, bexarotene, tazarotene                                                                                                                                                                                                                                                                                |
| <b>antiepileptics</b>                                 | Acetazolamide, carbamazepin, eslicarbazepine, ethosuximide, gabapentin, lacosamide, lamotrigine, levetiracetam, oxcarbazepine, perampanel, phenobarbital, phenytoin, pregabalin, primidone, valproic acid, rufinamide, sodium divalproex, sodium valproate, topiramate, sodium valproate, stiripentol, tiagabine, topiramate, vigabatrin, zonisamide                                               |
| <b>anti-thyroid drugs</b>                             | Methimazole, propylthiouracil                                                                                                                                                                                                                                                                                                                                                                      |
| <b>anti-coagulants</b>                                | Warfarin                                                                                                                                                                                                                                                                                                                                                                                           |
| <b>tetracycline derivative</b>                        | Nicoumalone, doxycyclin, minocyclin, streptomycin, tetracycline                                                                                                                                                                                                                                                                                                                                    |
| <b>angiotensin converting enzyme (ACE) inhibitors</b> | Benazepril, captopril, enalapril, fosinopril, lisinopril, perindopril, quinapril, ramipril, trandolapril, verapamil                                                                                                                                                                                                                                                                                |
| <b>androgens</b>                                      | Danazol, testosterone, methyltestosterone                                                                                                                                                                                                                                                                                                                                                          |
| <b>antineoplastic agents</b>                          | Anastrozole, bicalutamide, busereline, busulfan, chlorambucil, cyclophosphamide, estramustine, etoposide, exemestane, fluorouracil, flutamide, gosereline, hydroxyurea, ifosfamide, interferon alfa-2B, interferon alfa-2B (without albumine), letrozole, leuprolide (acetate), melphalan, mercaptopurine, methotrexate, nilutamide, procarbazine, tamoxifen, thioguanine, tretinoin, triptoreline |
| <b>others</b>                                         | Amiodarone, diethylstilbestrol, dihydroergotamine, fluconazole, leflunomide, lithium (carbonate), lithium (citrate), methotrexate, penicillamine, cyclophosphamide, misoprostol, diclofenac/misoprostol, quinine                                                                                                                                                                                   |
| <b>statins</b>                                        | Atorvastatine calcique, amlodipine/atorvastatine calcique, cerivastatine, fluvastatine sodium, lovastatine, lovastatine/nicotinic acid, pravastatine sodium, pravastatine sodium/AAS, rosuvastatine calcique, simvastatine                                                                                                                                                                         |
| <b>angiotensin-receptor blocker (ARB)</b>             | Candesartan, candesartan/HCTZ, eprosartan, eprosartan/HCTZ, irbesartan, irbesartan/HCTZ, losartan, losartan/HCTZ, olmesartan, olmesartan/HCTZZ, telmisartan, telmisartan/HCTZ, valsartan, valsartan/HCTZ                                                                                                                                                                                           |

**eTable 2.** List of Diagnostic Codes (*ICD-9* and *ICD-10*) and Medications Used for the Covariates

**Hypertension**

ICD-9 codes: 401.0-405.9, 642.0-642.9 and 796.2

ICD-10 codes: I10.0, I10.1, I15.0, I15.1, I15.2, I15.8, I15.9, O10, O11, O12, O13, O14, O15 and O16

Medication generic codes:

| <b>Generic name</b>      | <b>Quebec generic code</b> |
|--------------------------|----------------------------|
| Clonidine                | 10751                      |
| Methyldopa               | 6136                       |
| Hydralazine              | 4524                       |
| Minoxidil                | 41564                      |
| Doxazosine               | 45625                      |
| Prazosin                 | 37742                      |
| Terazosin                | 45520                      |
| Acebutolol               | 45463                      |
| Atenolol                 | 43670 - 46325 - 46315      |
| Bisoprolol               | 47355                      |
| Carvedilol               | 47199 - 46319              |
| Labetalol                | 45243                      |
| Metoprolol               | 38275 - 46763 - 46780      |
| Nadolol                  | 40563                      |
| Oxprenolol               | 42162                      |
| Pindolol                 | 39016                      |
| Pindolol-HCTZ            | 45408                      |
| Propranolol              | 8229                       |
| Sotalol                  | 44866                      |
| Timolol                  | 38314                      |
| Amlodipine               | 47006                      |
| Amlodipine/Atorvastatine | 47609                      |
| Felodipine               | 45624                      |
| Nifedipine               | 42708 - 46388 - 46469      |
| Nifedipine-AAS           | 47751                      |

|                           |                       |
|---------------------------|-----------------------|
| Nimodipine                | 45532                 |
| Diltiazem                 | 43228 - 47247         |
| Verapamil                 | 40550 - 46573         |
| Verapamil-Trandolapril    | 47440                 |
| Benazepril                | 47049                 |
| Captopril                 | 42071                 |
| Cilazapril                | 47056                 |
| Cilazapril-HCTZ           | 47320                 |
| Enalapril                 | 45476                 |
| Enalapril-HCTZ            | 45572                 |
| Fosinopril                | 47002                 |
| Lisinopril                | 45576                 |
| Lisinopril-HCTZ           | 47040                 |
| Perindopril               | 47117 - 46258         |
| Perindopril-Indapamide    | 47449                 |
| Quinapril                 | 45629                 |
| Quinapril-HCTZ            | 47301                 |
| Ramipril                  | 47079 - 46216         |
| Ramipril-HCTZ             | 47655                 |
| Trandolapril              | 47250                 |
| Trandolapril/Verapamil    | 47440                 |
| Candesartan               | 46529 - 47309         |
| Candesartan-HCTZ          | 46760 - 47412         |
| Eprosartan                | 47389                 |
| Eprosartan-HCTZ           | 47534 - 47532         |
| Irbesartan                | 46459 - 47282         |
| Irbesartan-HCTZ           | 47354                 |
| Losartan                  | 47135 - 46284 - 46441 |
| Losartan-HCTZ             | 47207                 |
| Olmesartan medoxomil      | 47763                 |
| Olmesartan medoxomil-HCTZ | 47764                 |
| Telmisartan               | 47333 - 46587         |
| Telmisartan-HCTZ          | 47413                 |
| Telmisartan/Amlodipine    | 47889                 |
| Valsartan                 | 46418 - 47259         |
| Valsartan-HCTZ            | 47369                 |
| Spirolactone              | 9100 - 46572          |
| Ethacryniqué              | 3562                  |
| Furosemide                | 4173                  |
| Amiloride                 | 41759                 |
| Amiloride-HCTZ            | 41772                 |
| Hydrochlorothiazide       | 4537                  |
| Chlorthalidone            | 1976                  |

|                                                          |       |
|----------------------------------------------------------|-------|
| Indapamide                                               | 43397 |
| Metolazone                                               | 19440 |
| Amiloride-HCTZ                                           | 41772 |
| Spirolactone-HCTZ                                        | 38158 |
| Triamterene-HCTZ                                         | 38197 |
| Triamterene                                              | 9763  |
| Amlodipine-Atorvastatine                                 | 47609 |
| Aliskirene                                               | 47706 |
| Aliskirene-HCTZ                                          | 47823 |
| Excluding the medication with the following formulation: |       |
| Formulation                                              | Code  |
| Ophthalmic powder                                        | 1479  |
| Ophthalmic ointment                                      | 1624  |
| Ophthalmic solution                                      | 2204  |
| Ophthalmic and Optic Solution                            | 2233  |
| Ophthalmic suspension                                    | 2784  |
| Ophthalmic and Optic Suspension                          | 2813  |
| Ophthalmic Irrigation Solution                           | 3480  |
| Ophthalmic gel                                           | 5365  |
| Ophthalmic Gel Solution                                  | 5599  |

## **Diabetes**

ICD-9 codes: 250.0-250.9, 271.4 and 790.2

ICD-10 codes: E10-E14 and R73.0

Medication generic codes:

| <b>Generic name</b>       | <b>Quebec generic code</b> |
|---------------------------|----------------------------|
| Metformin                 | 5824 - 47208               |
| Glucagon                  | 4238                       |
| Chlorpropamide            | 1937                       |
| Glyburide                 | 4264                       |
| Tolbutamide               | 9672 - 15184               |
| Gliclazide                | 46056 - 47329              |
| Glimepiride               | 46799 - 47427              |
| Acarbose                  | 46300 - 47151              |
| Pioglitazone              | 46678 - 47392              |
| Rosiglitazone             | 47371 - 46642              |
| Rosiglitazone/Metformine  | 46862                      |
| Rosiglitazone/Glimepiride | 47652                      |
| Nateglinide               | 46810                      |
| Repaglinide               | 47357 - 46568              |
| Saxagliptine              | 47817                      |
| Sitagliptine              | 47715                      |
| Sitagliptine/Metformine   | 47807 - 47832              |
| Insulin aspart            | 46798 - 47424              |

|                                                                      |               |
|----------------------------------------------------------------------|---------------|
| Insulin aspart/ Insulin aspart protamine                             |               |
| Insulin glulisine                                                    | 47749         |
| Insulin isophane bio-synthetic                                       | 44164         |
| Insulin lispro                                                       | 46322 - 47206 |
| Insulin zinc cristalline bio-synthetic                               | 44489         |
| Insulins zinc cristalline and isophane bio-synthetic                 | 45531         |
| Insulin aspart/Insulin aspart protamine                              | 47615         |
| Insulin detemir                                                      | 47586         |
| Insulin glargine                                                     | 47536         |
| Insulin lispro/Insulin lispro protamine                              | 47426         |
| Insulin globine zinc                                                 | 4823          |
| Insulin sulfate                                                      | 4888          |
| Insulin zinc cristalline (porc)                                      | 18296         |
| Insulin protamine zinc (beef)                                        | 18309         |
| Insulin protamine zinc (porc)                                        | 18322         |
| Insulin isophane (porc)                                              | 18335         |
| Insulin isophane (beef)                                              | 18348         |
| Insulin slow release (beef and porc)                                 | 39120         |
| Insulin isophane (beef and porc)                                     | 39133         |
| Insulin protamine zinc (beef and porc)                               | 39146         |
| Insulin semi-slow release (beef and porc)                            | 39159         |
| Insulin ultra-slow release (beef and porc)                           | 39172         |
| Insulin crystal zinc (beef and porc)                                 | 39185         |
| Insulin isophane (beef)                                              | 39458         |
| Insulin protamine zinc (beef)                                        | 39484         |
| Insulin protamine zinc (porc)                                        | 39497         |
| Insulin crystal zinc (beef)                                          | 39523         |
| Insulin slow release (porc)                                          | 41655         |
| Insulin crystal zinc (porc)/ Insulin isophane (porc)                 | 43033         |
| Insulin crystal zinc (beef)                                          | 43735         |
| Insulin isophane semi-synthetic of human sequence                    | 44151         |
| Insulin slow release semi-synthetic of human sequence                | 44476         |
| Insulin crystal zinc semi-synthetic of human sequence                | 44502         |
| Insulin ultra-slow release semi-synthetic of human sequence          | 44996         |
| Insulins isophane and crystal zinc semi-synthetics of human sequence | 45405         |
| Insulin slow release bio-synthetic of human sequence                 | 45415         |
| Insulin ultra-slow release bio-synthetic of human sequence           | 45483         |
| Insulins isophane and crystal zinc bio-synthetic of human sequence   | 45511         |
| Insulins crystal zinc and isophane semi-synthetics of human sequence | 45534         |
| Insulin crystal zinc (beef and porc)                                 | 46536         |
| Insulin isophane (beef and porc)                                     | 46537         |
| Insulin slow release (beef and porc)                                 | 46538         |
| Insulin isophane(human)/ Insulin injectable (human)                  | 46592         |
| Insulin isophane (human)                                             | 46602         |
| Insulin injectable (human)                                           | 46603         |
| Insulin lispro/Insulin isophane (human)                              | 46607         |
| Insulin crystal zinc (porc)                                          | 47004         |
| Insulin lispro/ Insulin lispro protamine                             | 47426         |

|                         |             |
|-------------------------|-------------|
| Alogliptine             | 48018       |
| Alogliptine/Metformine  | 48017       |
| Canagliflozine          | 48013       |
| Dipagliflozine          | n.a.        |
| Glidazide               | n.a.        |
| Glimepiride             | 47427-46779 |
| Linagliptine            | 47881       |
| Linagliptine/Metformine | 47965       |
| Liraglutine             | n.a.        |



## Asthma

ICD-9 codes: 493.0, 493.1, 493.3, 493.4, 493.5, 493.6, 493.7, 493.8 and 493.9

ICD-10 codes: J45.0, J45.8, J45.1 and J45.9

### Medication generic codes

| <b>Generic name</b>                                        | <b>Quebec generic code</b> |
|------------------------------------------------------------|----------------------------|
| Aminophylline                                              | 364, 46428                 |
| Beclomethasone                                             | 780*                       |
| Budesonide                                                 | 45499*                     |
| Budesonide/ formoterol                                     | 47428, 46800               |
| Cromoglicate sodium                                        | 39419, 47315               |
| Cromoglicate disodium                                      | 2223                       |
| Epinephrine                                                | 3380                       |
| Epinephrine                                                | 3406                       |
| Epinephrine racemic                                        | 3419                       |
| Fenoterol                                                  | 38548                      |
| Flunisolide                                                | 38730*                     |
| Fluticasone                                                | 47050*, 46435*             |
| Formoterol                                                 | 47231*                     |
| Formoterol                                                 | 47271, 46430               |
| Formoterol / budesonide                                    | 47428                      |
| Ipratropium (bromure)                                      | 43124, 46640               |
| Ipratropium (bromure)/ salbutamol (sulfate)                | 47186, 46302               |
| Isoproterenol (chlorhydrate)                               | 5083                       |
| Isoproterenol (chlorhydrate)/ phenylephrine (bitartrate)   | 5096                       |
| Isoproterenol (chlorhydrate)/ phenylephrine (chlorhydrate) | 5109                       |
| Isoproterenol (sulfate)                                    | 5070                       |
| Ketotifene (fumarate)                                      | 45555, 46752               |
| Montelukast sodium                                         | 47303, 47302, 46467        |
| Nedocromil sodium                                          | 47033, 45563, 46463        |
| Orciprenaline (sulfate)                                    | 6721                       |
| Oxtriphylline                                              | 43475                      |
| Pirbuterol (acetate)                                       | 47153, 46299               |
| Procaterol hemihydrate (chlorhydrate)                      | 45547                      |
| Salbutamol                                                 | 10530                      |
| Salbutamol (sulfate)                                       | 33634, 46737               |
| Salmeterol (xinafoate) / fluticasone (propionate)          | 47335, 46597               |
| Salmeterol (xinafoate)                                     | 47112, 46247               |
| Terbutaline (sulfate)                                      | 34180                      |
| Theophylline                                               | 9464, 46847, 9490, 9503    |
| Theophylline/dextrose                                      | 44944                      |
| Triamcinolone (acetonide)                                  | 9737*                      |
| Zafirlukast                                                | 47266, 46401               |
| Ciclesonide                                                | 47626                      |
| Mometasone                                                 | 45581, 47299               |
| Mometasone/Formeterol                                      | 47884, 47914               |
| Zolair                                                     | n.a.                       |

1 For code with a\* use only the following formulations:

| <b>Formulation</b>                 | <b>Code</b> |
|------------------------------------|-------------|
| Powder aerosol                     | 1305        |
| Powder aerosol with applicator     | 1334        |
| Aerosol solution                   | 1856        |
| Aerosol solution with applicator   | 1885        |
| Solution for Inhalation            | 1972        |
| Suspension aerosol                 | 2610        |
| Suspension aerosol with applicator | 2639        |
| Inhalation powder with applicator  | 5563        |
| Inhalation powder                  | 5564        |
| Oral spray                         | 5584        |
| Gel                                | 5619        |
| Powder for solution for inhalation | 5634        |

2

3 **Depression and anxiety**

4 ICD-9 codes: 296, 309, 311, 300.0 and 300.4

5 ICD-10 codes: F30, F31, F32, F33, F34, F38, F39, F40, F41 and F43

6 Medication generic codes:

| <b>Generic name</b> | <b>Quebec generic code</b> |
|---------------------|----------------------------|
| Citalopram          | 46543 - 47317              |
| Escitalopram        | 47553                      |
| Fluoxetine          | 45504                      |
| Fluvoxamine         | 45633                      |
| Paroxetine          | 46164 - 47061              |
| Sertraline          | 45630                      |
| Viibryd             | NA                         |
| Desvenlafaxine      | NA                         |
| Duloxetine          | 47714                      |
| Milnacipran         | NA                         |
| Venlafaxine         | 46244 - 47118              |
| Isocarboxazid       | 5018                       |
| Phenelzine          | 7280                       |
| Tranlycypromine     | 9698                       |
| Amitriptyline       | 442 - 429 - 46836          |
| Amoxapine           | 43696                      |
| Clomipramine        | 14781                      |
| Desipramine         | 2522                       |
| Doxepin             | 3198                       |
| Imipramine          | 4784                       |
| Maprotiline         | 37443                      |
| Nortriptyline       | 46835 - 6578               |
| Protriptyline       | 8294                       |

|               |               |
|---------------|---------------|
| Trimipramine  | 9906          |
| Bupropion     | 46435 - 47285 |
| Buspirone     | 45609         |
| Maprotiline   | 37443         |
| Mirtazapine   | 46744 - 47408 |
| Reboxetine    | NA            |
| Trazodone     | 43137         |
| Vilazodone    | NA            |
| Moclobemide   | 46427 - 47005 |
| L-tryptophane | 42058         |
| Nefazodone    | 46235 - 47093 |

7

8 **Thyroid diseases**

9 ICD-9 codes: 244.0-244.9 and 242.9

10 ICD-10 codes: E01, E02, E03 and E05

11 Medication generic codes:

| Generic name                              | Quebec generic code  |
|-------------------------------------------|----------------------|
| Levothyroxine sodium                      | 5252 - 46574         |
| Liothyronine sodium/ levothyroxine sodium | 33842                |
| Liothyronine sodium                       | 5317 - 46457 - 46474 |
| Methimazole                               | 40836                |
| Propylthiouracile                         | 8242                 |

12

13 **Tobacco dependence**

14 ICD-9 codes: 305.0, 305.1 and 649.0

15 ICD-10 codes: F17, O99.33, Z71.6, and Z72.0

16

17 **Alcohol dependence**

18 ICD-9 codes: 303, 305.0 and 980

19 ICD-10 codes: F10, O99.31

20 **Other drugs dependence**

21 ICD-9 codes: 304.0, 304.2, 304.3, 304.4, 304.5, 304.6, 304.7, 304.8 and 304.9

22 ICD-10 codes: F11, F12, F14, F15, F16, F18, F19

23

| <b>eTable 3. Number of Prescription Filled During Early Pregnancy by Pregnancy</b> |                              |
|------------------------------------------------------------------------------------|------------------------------|
| <b>Number of prescription filled</b>                                               | <b>Number of pregnancies</b> |
| 1                                                                                  | 897 (77.1%)                  |
| 2                                                                                  | 162 (13.9%)                  |
| 3                                                                                  | 43 (3.7%)                    |
| 4                                                                                  | 30 (2.6%)                    |
| 5                                                                                  | 11 (1.0%)                    |
| 6 or more                                                                          | 20 (1.7%)                    |

24

| <b>eTable 4. Distribution of the Number of Pregnancies Exposed to Specific Benzodiazepine Agents</b> |                                      |
|------------------------------------------------------------------------------------------------------|--------------------------------------|
| <b>Benzodiazepine agent</b>                                                                          | <b>Number of pregnancies exposed</b> |
| <i>Monotherapy</i>                                                                                   | <i>1,128 (97.0%)</i>                 |
| Lorazepam                                                                                            | 563                                  |
| Clonazepam                                                                                           | 200                                  |
| Oxazepam                                                                                             | 150                                  |
| Alprazolam                                                                                           | 91                                   |
| Temazepam                                                                                            | 26                                   |
| Bromazepam                                                                                           | 39                                   |
| Flurazepam                                                                                           | 21                                   |
| Diazepam                                                                                             | 26                                   |
| Chlordiazepoxide                                                                                     | 7                                    |
| Triazolam                                                                                            | 5                                    |
| <i>Bitherapy</i>                                                                                     | <i>35 (3%)</i>                       |
| Lorazepam and clonazepam                                                                             | 14                                   |
| Lorazepam and alprazolam                                                                             | 5                                    |
| Lorazepam and oxazepam                                                                               | 3                                    |
| Lorazepam and temazepam                                                                              | 2                                    |
| Lorazepam and nitrazepam                                                                             | 1                                    |
| Clonazepam and oxazepam                                                                              | 4                                    |
| Clonazepam and alprazolam                                                                            | 1                                    |
| Clonazepam and diazepam                                                                              | 1                                    |
| Alprazolam and oxazepam                                                                              | 2                                    |
| Alprazolam and temazepam                                                                             | 1                                    |
| Oxazepam and flurazepam                                                                              | 1                                    |

| <b>eTable5. Distribution of Duration of Prescriptions Filled and Quantity of Pills Dispensed by Benzodiazepine Specific Agents</b> |                                            |                                        |                                                          |
|------------------------------------------------------------------------------------------------------------------------------------|--------------------------------------------|----------------------------------------|----------------------------------------------------------|
|                                                                                                                                    | <b>Total number of prescription filled</b> | <b>Duration of prescription filled</b> | <b>Quantity of pills provided by prescription filled</b> |
| <b>Benzodiazepine agents</b>                                                                                                       | Mean ± SD - Median [min-max;Q3]            |                                        |                                                          |
| Overall benzodiazepines                                                                                                            | 1,715                                      | 16.5 ± 11.0 - 15 [1-90;30]             | 24.3 ± 21.7 - 20 [1-180;30]                              |
| Lorazepam                                                                                                                          | 768                                        | 14.5 ± 11.3 - 10 [1-65;30]             | 19.2 ± 16.9 - 15 [1-100;30]                              |
| Clonazepam                                                                                                                         | 402                                        | 16.8 ± 11.1 - 15 [1-90;30]             | 28.1 ± 22.9 - 21 [1-180;30]                              |
| Oxazepam                                                                                                                           | 211                                        | 20.8 ± 9.6 - 20 [1-45;30]              | 23.5 ± 13.0 - 30 [1-90;30]                               |
| Alprazolam                                                                                                                         | 149                                        | 18.9 ± 10.3 - 15 [2-40;30]             | 43.2 ± 38.6 - 30 [2-180;60]                              |
| Temazepam                                                                                                                          | 44                                         | 17.4 ± 9.0 - 15 [6-30;30]              | 20.6 ± 10.4 - 20 [7-42;30]                               |
| Bromazepam                                                                                                                         | 43                                         | 20.6 ± 11.6 - 20 [3-60;30]             | 26.3 ± 11.0 - 30 [10-60;30]                              |
| Flurazepam                                                                                                                         | 40                                         | 19.1 ± 10.0 - 20 [4-30;30]             | 20.8 ± 8.4 - 20 [4-30;30]                                |
| Diazepam                                                                                                                           | 28                                         | 14.6 ± 10.6 - 10 [1-30;30]             | 20.1 ± 19.3 - 15 [1-90;30]                               |
| Chlordiazepoxide                                                                                                                   | 20                                         | 12.5 ± 10.8 - 7 [3-30;25]              | 38.0 ± 24.6 - 28 [12-90;44]                              |
| Triazolam                                                                                                                          | 9                                          | 1.1 ± 0.3 - 1 [1-2;1]                  | 1.1 ± 0.3 - 1 [1-2;1]                                    |
| Nitrazepam                                                                                                                         | 1                                          | n.a.                                   | n.a.                                                     |
| SD = standard deviation; min = minimum; max = maximum; Q3 = third percentile.                                                      |                                            |                                        |                                                          |

**eTable 6.** Association Between Short and Long-acting Benzodiazepine Incident Exposure During Early Pregnancy and the Risk of Spontaneous Abortion

| Characteristic                                                      | Spontaneous abortion<br>n=27,149 | Controls<br>n=134,305 | Odds Ratio (OR)  |                    | P-value |
|---------------------------------------------------------------------|----------------------------------|-----------------------|------------------|--------------------|---------|
|                                                                     |                                  |                       | Crude<br>95%CI   | Adjusted<br>95% CI |         |
| Study medications exposure from LMP until index date                | 284 (1.05)                       | 624 (0.46)            | 2.30 (1.98-2.67) | 1.81 (1.55-2.12)   | < 0.001 |
| Short-acting benzodiazepines <sup>a</sup>                           | 98 (0.36)                        | 178 (0.13)            |                  |                    | < 0.001 |
| Long-acting benzodiazepines <sup>b</sup>                            |                                  |                       | 2.64 (2.03-3.43) | 1.73 (1.31-2.28)   |         |
| Antidepressants exposure from LMP until index date                  | 628 (2.31)                       | 1,897 (1.41)          |                  |                    | < 0.001 |
| SSRIs <sup>c</sup> alone                                            | 289 (1.06)                       | 874 (0.65)            | 1.64 (1.49-1.81) | 1.29 (1.16-1.43)   | < 0.001 |
| SNRIs <sup>d</sup> alone                                            | 129 (0.48)                       | 313 (0.23)            | 1.81             | 1.43               | < 0.001 |
| Tricyclics <sup>e</sup> alone                                       | 136 (0.50)                       | 266 (0.20)            | 1.70 (1.47-1.97) | 1.30 (1.12-1.51)   | 0.007   |
| Others <sup>7</sup> alone                                           | 146 (0.54)                       | 350 (0.26)            | 2.06 (1.67-2.57) | 1.83 (1.46-2.30)   | 0.002   |
| Combined antidepressants                                            | 22 (0.08)                        |                       |                  |                    |         |
| Antipsychotics exposure from LMP until index date                   | 251 (0.92)                       | 191 (0.14)            | 2.48 (1.98-3.10) | 1.94 (1.54-2.45)   | 0.009   |
| Typical <sup>g</sup> alone                                          | 4 (0.01)                         | 584 (0.43)            |                  |                    | 0.48    |
| Atypical <sup>h</sup> alone                                         |                                  | 22 (0.02)             | 2.02 (1.64-2.49) | 1.35 (1.09-1.69)   |         |
| Combined antipsychotics                                             |                                  |                       | 0.54 (0.34-0.85) | 0.47 (0.30-0.75)   |         |
|                                                                     |                                  |                       | 2.03 (1.73-2.38) | 1.26 (1.06-1.50)   |         |
|                                                                     |                                  |                       | 0.96 (0.28-3.28) | 0.64 (0.18-2.23)   |         |
| Demographic characteristics at LMP                                  |                                  |                       |                  |                    |         |
| Maternal age (y)                                                    |                                  |                       |                  |                    |         |
| Less than 35                                                        | 20,858 (76.83)                   | 113,292 (84.35)       | 1.00             | 1.00               |         |
| 35-39                                                               |                                  |                       | 1.38 (1.32-1.43) | 1.55 (1.49-1.61)   | < 0.001 |
| 40 or more                                                          | 4,337 (15.97)                    | 17,101 (12.73)        | 2.73 (2.57-2.90) | 3.11 (2.92-3.31)   | < 0.001 |
| Welfare recipient                                                   | 1,954 (7.20)                     | 3,912 (2.91)          | 1.16 (1.12-1.19) | 1.07 (1.03-1.10)   | 0.45    |
| Urban dweller                                                       | 6,592 (24.28)                    | 29,112 (21.68)        | 1.00 (0.96-1.03) | 1.02 (0.98-1.05)   |         |
| Emergency visit and/or hospitalization                              | 22,426 (82.60)                   | 110,978 (82.63)       |                  |                    |         |
| Health care utilization in the 12-month before LMP until index date | 15,279 (56.28)                   | 70,872 (52.77)        | 1.15 (1.11-1.18) | 1.17 (1.13-1.21)   | < 0.001 |

|                                                                                                                                                                                                                                                                                                                                                                                        |               |                 |                      |                      |         |
|----------------------------------------------------------------------------------------------------------------------------------------------------------------------------------------------------------------------------------------------------------------------------------------------------------------------------------------------------------------------------------------|---------------|-----------------|----------------------|----------------------|---------|
| Psychiatrist visit                                                                                                                                                                                                                                                                                                                                                                     | 365 (1.34)    | 1,210<br>(0.90) | 1.52 (1.34-<br>1.73) | 1.07 (0.94-<br>1.22) |         |
| General practitioner (GP) visits                                                                                                                                                                                                                                                                                                                                                       |               |                 |                      |                      |         |
| 0                                                                                                                                                                                                                                                                                                                                                                                      | 14,192        |                 |                      |                      | 0.39    |
| 1-2                                                                                                                                                                                                                                                                                                                                                                                    | (52.27)       | 72,006          | 1.00                 | 1.00                 | < 0.001 |
| 3 or more                                                                                                                                                                                                                                                                                                                                                                              | 3,885 (14.31) | (53.61)         | 1.05 (0.99-<br>1.11) | 1.03 (0.97-<br>1.09) |         |
| Number of other specialists visits                                                                                                                                                                                                                                                                                                                                                     | 9,072 (33.92) | 22,281          |                      |                      |         |
| 0                                                                                                                                                                                                                                                                                                                                                                                      |               | (16.59)         | 1.36 (1.29-<br>1.43) | 1.17 (1.11-<br>1.23) | 0.16    |
| 1                                                                                                                                                                                                                                                                                                                                                                                      | 17,239        | 40,018          |                      |                      | 0.03    |
| 2 or more                                                                                                                                                                                                                                                                                                                                                                              | (63.50)       | (29.30)         |                      |                      |         |
|                                                                                                                                                                                                                                                                                                                                                                                        | 2,273 (8.37)  |                 | 1.00                 | 1.00                 |         |
|                                                                                                                                                                                                                                                                                                                                                                                        | 7,637 (28.13) | 86,772          | 0.98 (0.93-<br>1.04) | 0.96 (0.91-<br>1.02) |         |
|                                                                                                                                                                                                                                                                                                                                                                                        |               | (64.61)         |                      |                      |         |
|                                                                                                                                                                                                                                                                                                                                                                                        |               | 12,268          | 1.16 (1.11-<br>1.20) | 1.05 (1.01-<br>1.10) |         |
|                                                                                                                                                                                                                                                                                                                                                                                        |               | (9.13)          |                      |                      |         |
|                                                                                                                                                                                                                                                                                                                                                                                        |               | 35,265          |                      |                      |         |
|                                                                                                                                                                                                                                                                                                                                                                                        |               | (26.26)         |                      |                      |         |
| ≥ one diagnostic in the 12-month before LMP until index date                                                                                                                                                                                                                                                                                                                           | 2,681 (9.88)  | 10,475          | 1.38 (1.32-<br>1.44) | 1.17 (1.11-<br>1.23) | < 0.001 |
| Mood and anxiety disorders                                                                                                                                                                                                                                                                                                                                                             | 15 (0.06)     | (7.80)          |                      |                      | 0.55    |
| Insomnia                                                                                                                                                                                                                                                                                                                                                                               |               | 54 (0.04)       | 1.46 (0.79-<br>2.71) | 1.22 (0.64-<br>2.32) |         |
| Folic acid exposure in the 6-months before LMP until index date                                                                                                                                                                                                                                                                                                                        | 751 (2.77)    | 5,181           | 0.71 (0.66-<br>0.78) | 0.69 (0.64-<br>0.76) | < 0.001 |
| Co-morbidities in the 12-month before LMP until index date                                                                                                                                                                                                                                                                                                                             |               |                 |                      |                      |         |
| Hypertension                                                                                                                                                                                                                                                                                                                                                                           | 1,336 (4.92)  | 5,607           | 1.20 (1.13-<br>1.28) | 1.18 (1.10-<br>1.26) | < 0.001 |
| Diabetes                                                                                                                                                                                                                                                                                                                                                                               | 1,022 (3.76)  | (4.17)          |                      |                      | 0.23    |
| Asthma                                                                                                                                                                                                                                                                                                                                                                                 | 5,001 (18.46) | 4,957           | 0.99 (0.92-<br>1.06) | 1.05 (0.97-<br>1.13) | < 0.001 |
| Thyroid disorders                                                                                                                                                                                                                                                                                                                                                                      | 1,467 (5.40)  | (3.69)          |                      |                      | 0.003   |
| Tobacco dependence                                                                                                                                                                                                                                                                                                                                                                     | 696 (2.56)    | 20,788          | 1.22 (1.18-<br>1.27) | 1.18 (1.13-<br>1.22) | < 0.001 |
| Alcohol dependence                                                                                                                                                                                                                                                                                                                                                                     | 258 (0.95)    | (15.48)         |                      |                      | 0.02    |
| Other drugs dependence                                                                                                                                                                                                                                                                                                                                                                 | 373 (1.37)    | 7,581           | 0.92 (0.87-<br>0.98) | 0.91 (0.85-<br>0.97) | 0.04    |
|                                                                                                                                                                                                                                                                                                                                                                                        |               | (5.64)          |                      |                      |         |
|                                                                                                                                                                                                                                                                                                                                                                                        |               | 2,381           | 1.44 (1.31-<br>1.57) | 1.28 (1.16-<br>1.41) |         |
|                                                                                                                                                                                                                                                                                                                                                                                        |               | (1.77)          |                      |                      |         |
|                                                                                                                                                                                                                                                                                                                                                                                        |               | 727 (0.54)      | 1.73 (1.48-<br>2.01) | 1.22 (1.03-<br>1.45) |         |
|                                                                                                                                                                                                                                                                                                                                                                                        |               | (0.91)          |                      |                      |         |
|                                                                                                                                                                                                                                                                                                                                                                                        |               | 1,227           | 1.47 (1.30-<br>1.67) | 1.15 (1.01-<br>1.32) |         |
|                                                                                                                                                                                                                                                                                                                                                                                        |               | (0.91)          |                      |                      |         |
| Pregnancy follow-up by gynecologist or obstetrician                                                                                                                                                                                                                                                                                                                                    | 8,037 (29.60) | 58,943          | 0.52 (0.50-<br>0.54) | 0.47 (0.45-<br>0.48) | < 0.001 |
| Pregnancy in the 12-month before LMP                                                                                                                                                                                                                                                                                                                                                   | 1,693 (6.24)  | (43.89)         |                      |                      | < 0.001 |
|                                                                                                                                                                                                                                                                                                                                                                                        |               | 6,246           | 1.39 (1.31-<br>1.48) | 1.22 (1.14-<br>1.30) |         |
|                                                                                                                                                                                                                                                                                                                                                                                        |               | (4.65)          |                      |                      |         |
| <sup>a</sup> Short-acting benzodiazepines included alprazolam, bromazepam, lorazepam, oxazepam, temazepam and triazolam.<br><sup>b</sup> Long-acting benzodiazepines included chlordiazepoxide, clobazam, clonazepam, diazepam, flurazepam and nitrazepam.<br><sup>c</sup> SSRI antidepressants included citalopram, escitalopram, fluoxetine, fluvoxamine, paroxetine and sertraline. |               |                 |                      |                      |         |



<sup>d</sup>SNRI antidepressants included desvenlafaxine, duloxetine and venlafaxine.

<sup>e</sup>Tricyclic antidepressants included amitriptyline, clomipramine, desipramine, doxepin, imipramine, nortriptyline and trimipramine.

<sup>f</sup>Other antidepressants included bupropion, buspirone, L-tryptophan, maprotiline, mirtazapine, trazodone, moclobemide and nefazodone.

<sup>g</sup>Typical antipsychotic agents included chlorpromazine, fluphenazine, flupentixol, haloperidol, loxapine, methotrimeprazine, pericyazine, perphenazine, pimozide, prochlorperazine, trifluoperazine and zuclopenthixol.

<sup>h</sup>Atypical antipsychotic agents included aripiprazole, clozapine, olanzapine, risperidone, quetiapine and ziprasidone.

| <b>eTable 7.</b> Association Between Mean Daily Dose of Benzodiazepine Incident Exposure During Early Pregnancy and the Risk of Spontaneous Abortion |                                  |                       |                  |                    |         |
|------------------------------------------------------------------------------------------------------------------------------------------------------|----------------------------------|-----------------------|------------------|--------------------|---------|
| Characteristic                                                                                                                                       | Spontaneous abortion<br>n=27,149 | Controls<br>n=134,305 | Odds Ratio (OR)  |                    | P-value |
|                                                                                                                                                      |                                  |                       | Crude<br>95%CI   | Adjusted<br>95% CI |         |
| Mean daily dose of study medications exposure from LMP until index date                                                                              |                                  |                       |                  |                    |         |
| 1-5 mg/day                                                                                                                                           | 202 (0.74)                       | 470 (0.35)            | 2.17 (1.82-2.58) | 1.73 (1.44-2.08)   | < 0.001 |
| 6-20 mg/day                                                                                                                                          | 163 (0.60)                       | 300 (0.22)            | 2.70 (2.20-3.31) | 1.96 (1.59-2.43)   | < 0.001 |
| more than 20 mg/day                                                                                                                                  | 10 (0.04)                        | 18 (0.01)             | 3.22 (1.41-7.34) | 2.55 (1.08-6.01)   | 0.03    |
| Antidepressants exposure from LMP until index date                                                                                                   | 628 (2.31)                       | 1,897 (1.41)          |                  |                    | < 0.001 |
| SSRIs <sup>a</sup> alone                                                                                                                             | 289 (1.06)                       | 874 (0.65)            |                  |                    | 0.001   |
| SNRIs <sup>b</sup> alone                                                                                                                             | 129 (0.48)                       | 313 (0.23)            | 1.64 (1.49-1.81) | 1.28 (1.15-1.43)   | < 0.001 |
| Tricyclics <sup>c</sup> alone                                                                                                                        | 136 (0.50)                       | 266 (0.20)            | 1.70 (1.47-1.97) | 1.29 (1.11-1.50)   | < 0.001 |
| Others <sup>d</sup> alone                                                                                                                            | 146 (0.54)                       | 350 (0.26)            | 2.06 (1.67-2.57) | 1.81 (1.44-2.28)   | 0.009   |
| Combined antidepressants                                                                                                                             |                                  |                       |                  |                    |         |
| Antipsychotics exposure from LMP until index date                                                                                                    | 22 (0.08)                        | 191 (0.14)            | 2.06 (1.67-2.57) | 1.81 (1.44-2.28)   | 0.002   |
| Typical <sup>e</sup> alone                                                                                                                           | 251 (0.92)                       | 584 (0.43)            | 2.48 (1.98-3.10) | 1.94 (1.53-2.44)   | 0.009   |
| Atypical <sup>f</sup> alone                                                                                                                          | 4 (0.01)                         | 22 (0.02)             | 2.02 (1.64-2.49) | 1.34 (1.08-1.68)   | 0.47    |
| Combined antipsychotics                                                                                                                              |                                  |                       |                  |                    |         |
|                                                                                                                                                      |                                  |                       | 0.54 (0.34-0.85) | 0.47 (0.30-0.75)   |         |
|                                                                                                                                                      |                                  |                       | 2.03 (1.73-2.38) | 1.26 (1.06-1.50)   |         |
|                                                                                                                                                      |                                  |                       | 0.96 (0.28-3.28) | 0.63 (0.18-2.21)   |         |
| Demographic characteristics at LMP                                                                                                                   |                                  |                       |                  |                    |         |
| Maternal age (y)                                                                                                                                     |                                  |                       |                  |                    |         |
| Less than 35                                                                                                                                         | 20,858 (76.83)                   | 113,292 (84.35)       | 1.00             | 1.00               |         |
| 35-39                                                                                                                                                | 4,337 (15.97)                    | 17,101 (12.73)        | 1.38 (1.32-1.43) | 1.55 (1.49-1.61)   | < 0.001 |
| 40 or more                                                                                                                                           | 1,954 (7.20)                     | 3,912 (2.91)          | 2.73 (2.57-2.90) | 3.10 (2.91-3.30)   | < 0.001 |
| Welfare recipient                                                                                                                                    | 6,592 (24.28)                    | 22,426 (82.60)        | 1.16 (1.12-1.19) | 1.07 (1.03-1.10)   | 0.42    |
| Urban dweller                                                                                                                                        |                                  | 29,112 (21.68)        | 1.00 (0.96-1.03) | 1.02 (0.98-1.05)   |         |
|                                                                                                                                                      |                                  | 110,978 (82.63)       |                  |                    |         |

|                                                                                                                          |                |                |                  |                  |         |
|--------------------------------------------------------------------------------------------------------------------------|----------------|----------------|------------------|------------------|---------|
| Health care utilization in the 12-month before LMP until index date                                                      | 15,279         | 70,872         | 1.15 (1.11-1.18) | 1.18 (1.14-1.22) | < 0.001 |
| Emergency visit and/or hospitalization                                                                                   | (56.28)        | (52.77)        |                  |                  | 0.33    |
| Psychiatrist visit                                                                                                       | 365 (1.34)     | 1,210 (0.90)   | 1.52 (1.34-1.73) | 1.07 (0.94-1.22) |         |
| General practitioner (GP) visits                                                                                         |                |                |                  |                  | 0.43    |
| 0                                                                                                                        | 14,192 (52.27) | 72,006 (53.61) | 1.00             | 1.00             | < 0.001 |
| 1-2                                                                                                                      |                |                |                  |                  |         |
| 3 or more                                                                                                                | 3,885 (14.31)  |                | 1.05 (0.99-1.11) | 1.02 (0.97-1.08) |         |
| Number of other specialists visits                                                                                       | 9,072 (33.92)  | 22,281 (16.59) | 1.36 (1.29-1.43) | 1.17 (1.11-1.24) | 0.25    |
| 0                                                                                                                        |                |                |                  |                  | 0.002   |
| 1                                                                                                                        | 17,239 (63.50) | 40,018 (29.30) |                  |                  |         |
| 2 or more                                                                                                                | 2,273 (8.37)   | 86,772 (64.61) | 1.00             | 1.00             |         |
|                                                                                                                          | 7,637 (28.13)  | 12,268 (9.13)  | 0.98 (0.93-1.04) | 0.97 (0.91-1.02) |         |
|                                                                                                                          |                | 35,265 (26.26) | 1.16 (1.11-1.20) | 1.07 (1.02-1.12) |         |
| ≥ one diagnostic in the 12-month before LMP until index date                                                             | 2,681 (9.88)   | 10,475 (7.80)  | 1.38 (1.32-1.44) | 1.16 (1.11-1.22) | < 0.001 |
| Mood and anxiety disorders                                                                                               | 15 (0.06)      | 54 (0.04)      | 1.46 (0.79-2.71) | 1.22 (0.64-2.32) | 0.55    |
| Insomnia                                                                                                                 |                |                |                  |                  |         |
| Folic acid exposure in the 6-months before LMP until index date                                                          | 751 (2.77)     | 5,181 (3.86)   | 0.71 (0.66-0.78) | 0.69 (0.64-0.76) | < 0.001 |
| Co-morbidities in the 12-month before LMP until index date                                                               |                |                |                  |                  |         |
| Hypertension                                                                                                             | 1,336 (4.92)   | 5,607 (4.17)   | 1.20 (1.13-1.28) | 1.18 (1.11-1.27) | < 0.001 |
| Diabetes                                                                                                                 | 1,022 (3.76)   | 4,957 (3.69)   | 0.99 (0.92-1.06) | 1.05 (0.98-1.14) | 0.22    |
| Asthma                                                                                                                   | 5,001 (18.46)  | 20,788 (15.48) | 1.22 (1.18-1.27) | 1.17 (1.13-1.22) | < 0.001 |
| Thyroid disorders                                                                                                        | 1,467 (5.40)   | 7,581 (5.64)   | 0.92 (0.87-0.98) | 0.91 (0.85-0.97) | 0.003   |
| Tobacco dependence                                                                                                       | 696 (2.56)     | 2,381 (1.77)   | 1.44 (1.31-1.57) | 1.28 (1.16-1.42) | < 0.001 |
| Alcohol dependence                                                                                                       | 258 (0.95)     | 727 (0.54)     | 1.73 (1.48-2.01) | 1.22 (1.03-1.44) | 0.02    |
| Other drugs dependence                                                                                                   | 373 (1.37)     | 1,227 (0.91)   | 1.47 (1.30-1.67) | 1.15 (1.01-1.32) | 0.04    |
| Pregnancy follow-up by gynecologist or obstetrician                                                                      | 8,037 (29.60)  | 58,943 (43.89) | 0.52 (0.50-0.54) | 0.47 (0.45-0.48) | < 0.001 |
| Pregnancy in the 12-month before LMP                                                                                     | 597 (2.2)      | 2,614 (1.95)   | 2.08 (1.72-2.51) | 1.78 (1.46-2.16) | < 0.001 |
| <sup>a</sup> SSRI antidepressants included citalopram, escitalopram, fluoxetine, fluvoxamine, paroxetine and sertraline. |                |                |                  |                  |         |

<sup>b</sup>SNRI antidepressants included desvenlafaxine, duloxetine and venlafaxine.

<sup>c</sup>Tricyclic antidepressants included amitriptyline, clomipramine, desipramine, doxepin, imipramine, nortriptyline and trimipramine.

<sup>d</sup>Other antidepressants included bupropion, buspirone, L-tryptophan, maprotiline, mirtazapine, trazodone, moclobemide and nefazodone.

<sup>e</sup>Typical antipsychotic agents included chlorpromazine, fluphenazine, flupentixol, haloperidol, loxapine, methotrimeprazine, pericyazine, perphenazine, pimozide, prochlorperazine, trifluoperazine and zuclopenthixol.

<sup>f</sup>Atypical antipsychotic agents included aripiprazole, clozapine, olanzapine, risperidone, quetiapine and ziprasidone.

33 **eMethods. Sensitivity Analyses**

34

35 **Methods**

36 Since it recognized that the risk of spontaneous abortion is higher among women with prior spontaneous  
37 abortions compared to women with previous deliveries, we categorized the prior pregnancies in the year  
38 before the first day of gestation as prior spontaneous abortion, prior planned abortions, and prior delivery in  
39 the year before. Second, to take into account the underlying indication, we performed a sensitivity analysis  
40 among pregnancies of women with a history of mood and anxiety disorders based on ICD-9 and ICD-10  
41 diagnosis codes. Third, to investigate potential exposure misclassifications, we also used restricted definitions  
42 of exposure. Since benzodiazepines are prescribed as occasional or as needed medications, we first considered  
43 pregnancies of women who had only one benzodiazepine prescription filled prior the LMP with duration that  
44 overlapped the LMP as unexposed. Second, we only considered pregnancies of women with two or more  
45 benzodiazepine prescription filled during early pregnancy as exposed. Finally, to take into account the  
46 possibility of receiving benzodiazepine for impending spontaneous abortion, we excluded all prescription  
47 filled in the 7 days prior to the index date (date of the spontaneous abortion).

48 As many women are being followed for mental health problems by a general practitioner, we also  
49 dichotomized the covariate on medical visits as general practitioner visit for mood and anxiety disorders, and  
50 general practitioner visit for other reasons. Finally, as the definition of mood and anxiety disorders based on  
51 diagnostic codes recorded in the RAMQ and MED-ECHO databases was not validated, which could  
52 potentially bias results, we performed another sensitivity analysis, using the Canadian Chronic Disease  
53 Surveillance System (CCDSS) definition of mood and anxiety disorders. The CCDSS use the ICD-9 codes:  
54 296, 300 and 311, and the ICD-10 codes: F30-F48 and F68 for the identification of the mood and anxiety  
55 disorders.<sup>39</sup>

56

57

58 39. *Government of Canada Report from the Canadian Chronic Disease Surveillance System: Mood and*  
59 *Anxiety Disorders in Canada, 2016. Available at: [https://www.canada.ca/en/public-](https://www.canada.ca/en/public-health/services/publications/diseases-conditions/report-canadian-chronic-disease-surveillance-system-mood-anxiety-disorders-canada-2016.html#a3)*  
60 *health/services/publications/diseases-conditions/report-canadian-chronic-disease-surveillance-system-mood-*  
61 *anxiety-disorders-canada-2016.html#a3. Accessed Janvier 20, 2019.*

62

63

64

65 **Statistical analyses**

66

67 We performed several sensitivity analyses to evaluate the robustness of our estimates. These were performed  
68 using the overall incident benzodiazepine exposure in early pregnancy model. First, we estimated the  
69 association between benzodiazepine exposure and spontaneous abortion adjusting for categories of prior  
70 pregnancies (childbirth, planned/induced abortion or spontaneous abortion). Second, to take into account the  
71 underlying indication, we estimated the association only among pregnancies of women with a history of mood  
72 and anxiety disorders based on ICD-9 and ICD-10 diagnostic codes. Third, we evaluated the robustness of our  
73 incident exposure definition using three additional definitions of exposure: 1) considering pregnancies of  
74 women with only one prescription filled prior to pregnancy but with duration overlapping the LMP as  
75 unexposed; 2) considering only pregnancies of women who filled at least two prescriptions of benzodiazepines  
76 during pregnancy as exposed; and 3) considering pregnancies of women with only one prescription filled in  
77 the 7 days before index date (date of spontaneous abortion) but after the 1<sup>st</sup> day of LMP as unexposed. We  
78 performed three independent conditional regression models using each new definition of exposure. Moreover,  
79 we performed a sensitivity analysis stratifying on the reason for general practitioner visit (visits for mood and  
80 anxiety disorders; of for other reasons) to improve the specificity of the physician consultation. Finally, we  
81 estimated the association between benzodiazepine and spontaneous abortion using the mood and anxiety  
82 disorders definition provided by the CCDSS.<sup>39</sup>

83

84 **Results**

85

86 Adjusting for prior pregnancy history as a categorical variable, the association between benzodiazepine  
87 exposure and the risk of spontaneous abortion remained unchanged (aOR 1.85; 95% CI 1.61-2.13) (eTable 8,  
88 Supplement). In the restricted analysis among pregnancies with a history of mood and anxiety disorders, we  
89 observed a stronger association between benzodiazepine exposure and spontaneous abortion (aOR 2.85; 95%  
90 CI 1.72-4.72; 198 exposed cases) (eTable 9, Supplement). However, the confidence interval included the point  
91 estimate of the association found in the main analysis, which was suggesting that mood and anxiety disorders  
92 were not effect modifiers in our study.

93

94 The estimates of the association between benzodiazepine exposure and spontaneous abortion were similar for  
95 each sensitivity analysis performed using the additional exposure definitions. First, considering pregnancies of

96 women with only one benzodiazepine prescription filled prior to pregnancy but with duration overlapping the  
97 LMP as unexposed (aOR 1.97; 95% CI 1.69-2.29; 321 exposed cases) (eTable 10, Supplement); second,  
98 considering exposure as at least two prescription filled during pregnancy (aOR 1.89; 95% CI 1.43-2.48; 101  
99 exposed cases) (eTable 11, Supplement); and, considering pregnancies of women with only one prescription  
100 filled in the 7 days prior to index date but after LMP as unexposed (aOR 1.89; 95% CI 1.63-2.20; 324  
101 exposed cases) (eTable 12, Supplement).

102  
103 The estimate of the association in the sensitivity analysis stratified on the reason for the general practitioner's  
104 visit also remained unchanged (aOR 1.83; 95% CI 1.60-2.11; 375 exposed cases) (eTable 13, Supplement).

105  
106 Finally, the association between benzodiazepines and spontaneous abortion remained unchanged in the  
107 sensitivity analysis using the CCDSS<sup>39</sup> definition of mood and anxiety disorder (aOR 1.86; 95% CI 1.62-2.14;  
108 375 exposed cases) (eTable 14, Supplement).

| <b>eTable 8.</b> Association Between Benzodiazepine Incident Exposure During Early Pregnancy and the Risk of Spontaneous Abortion With the Variable Prior Pregnancy Categorized by Termination (Childbirth, Planned/Induced Abortion and Spontaneous Abortion) |                                  |                       |                  |                    |         |
|----------------------------------------------------------------------------------------------------------------------------------------------------------------------------------------------------------------------------------------------------------------|----------------------------------|-----------------------|------------------|--------------------|---------|
| Characteristic                                                                                                                                                                                                                                                 | Spontaneous abortion<br>n=27,149 | Controls<br>n=134,305 | Odds Ratio (OR)  |                    | P-value |
|                                                                                                                                                                                                                                                                |                                  |                       | Crude<br>95%CI   | Adjusted<br>95% CI |         |
| Study medications exposure from LMP until index date<br>Benzodiazepines (overall)                                                                                                                                                                              | 375 (1.38)                       | 788 (0.59)            | 2.39 (2.10-2.73) | 1.85 (1.61-2.13)   | < 0.001 |
| Antidepressants exposure from LMP until index date                                                                                                                                                                                                             | 628 (2.31)                       | 1,897 (1.41)          | 1.64 (1.49-1.81) | 1.29 (1.16-1.43)   | < 0.001 |
| SSRIs <sup>a</sup> alone                                                                                                                                                                                                                                       | 129 (0.48)                       | 874 (0.65)            | 1.70 (1.47-1.97) | 1.30 (1.11-1.51)   | < 0.001 |
| SNRIs <sup>b</sup> alone                                                                                                                                                                                                                                       | 136 (0.50)                       | 313 (0.23)            | 2.06 (1.67-2.57) | 1.83 (1.46-2.29)   | 0.008   |
| Tricyclics <sup>c</sup> alone                                                                                                                                                                                                                                  | 146 (0.54)                       | 266 (0.20)            | 2.48 (1.98-3.10) | 1.94 (1.54-2.45)   | 0.002   |
| Others <sup>d</sup> alone                                                                                                                                                                                                                                      | 22 (0.08)                        | 350 (0.26)            | 2.02 (1.64-2.49) | 1.35 (1.08-1.70)   | 0.008   |
| Combined antidepressants                                                                                                                                                                                                                                       | 22 (0.08)                        | 350 (0.26)            | 0.54 (0.34-0.85) | 0.47 (0.30-0.75)   | 0.48    |
| Antipsychotics exposure from LMP until index date                                                                                                                                                                                                              | 251 (0.92)                       | 191 (0.14)            | 2.03 (1.73-2.38) | 1.26 (1.06-1.50)   |         |
| Typical <sup>e</sup> alone                                                                                                                                                                                                                                     | 4 (0.01)                         | 584 (0.43)            | 0.96 (0.28-3.28) | 0.64 (0.18-2.23)   |         |
| Atypical <sup>f</sup> alone                                                                                                                                                                                                                                    |                                  | 22 (0.02)             |                  |                    |         |
| Combined antipsychotics                                                                                                                                                                                                                                        |                                  | 22 (0.02)             |                  |                    |         |
| Demographic characteristics at LMP                                                                                                                                                                                                                             |                                  |                       |                  |                    |         |
| Maternal age (y)                                                                                                                                                                                                                                               |                                  |                       |                  |                    |         |
| Less than 35                                                                                                                                                                                                                                                   | 20,858 (76.83)                   | 113,292 (84.35)       | 1.00             | 1.00               |         |
| 35-39                                                                                                                                                                                                                                                          | 4,337 (15.97)                    | 17,101 (12.73)        | 1.38 (1.32-1.43) | 1.55 (1.49-1.61)   | < 0.001 |
| 40 or more                                                                                                                                                                                                                                                     | 1,954 (7.20)                     | 17,101 (12.73)        | 2.73 (2.57-2.90) | 3.10 (2.91-3.30)   | < 0.001 |
| Welfare recipient                                                                                                                                                                                                                                              | 6,592 (24.28)                    | 3,912 (2.91)          | 1.16 (1.12-1.19) | 1.06 (1.03-1.10)   | 0.47    |
| Urban dweller                                                                                                                                                                                                                                                  | 22,426 (82.60)                   | 29,112 (21.68)        | 1.00 (0.96-1.03) | 1.01 (0.98-1.05)   |         |
| Health care utilization in the 12-month before LMP until index date                                                                                                                                                                                            |                                  |                       |                  |                    |         |
| Emergency visit and/or hospitalization                                                                                                                                                                                                                         | 15,279 (56.28)                   | 70,872 (52.77)        | 1.15 (1.11-1.18) | 1.18 (1.14-1.22)   | < 0.001 |
| Psychiatrist visit                                                                                                                                                                                                                                             | 365 (1.34)                       |                       |                  |                    | 0.33    |



|                                                                 |               |            |             |             |         |
|-----------------------------------------------------------------|---------------|------------|-------------|-------------|---------|
| General practitioner (GP) visits                                |               |            |             |             |         |
| 0                                                               | 14,192        | 1,210      | 1.52 (1.34- | 1.07 (0.93- | 0.47    |
| 1-2                                                             | (52.27)       | (0.90)     | 1.73)       | 1.22)       | < 0.001 |
| 3 or more                                                       | 3,885 (14.31) | 72,006     | 1.00        | 1.00        |         |
| Number of other specialists visits                              | 9,072 (33.92) | (53.61)    | 1.05 (0.99- | 1.02 (0.97- |         |
| 0                                                               |               | 22,281     | 1.11)       | 1.08)       | 0.18    |
| 1                                                               | 17,239        | (16.59)    | 1.36 (1.29- | 1.16 (1.10- | 0.002   |
| 2 or more                                                       | (63.50)       | 40,018     | 1.43)       | 1.22)       |         |
|                                                                 | 2,273 (8.37)  | (29.30)    |             |             |         |
|                                                                 | 7,637 (28.13) |            | 1.00        | 1.00        |         |
|                                                                 |               | 86,772     | 0.98 (0.93- | 0.96 (0.91- |         |
|                                                                 |               | (64.61)    | 1.04)       | 1.02)       |         |
|                                                                 |               | 12,268     | 1.16 (1.11- | 1.06 (1.01- |         |
|                                                                 |               | (9.13)     | 1.20)       | 1.11)       |         |
|                                                                 |               | 35,265     |             |             |         |
|                                                                 |               | (26.26)    |             |             |         |
| ≥ one diagnostic in the 12-month before LMP until index date    | 2,681 (9.88)  | 10,475     | 1.38 (1.32- | 1.16 (1.11- | < 0.001 |
| Mood and anxiety disorders                                      | 15 (0.06)     | (7.80)     | 1.44)       | 1.22)       | 0.56    |
| Insomnia                                                        |               | 54 (0.04)  | 1.46 (0.79- | 1.21 (0.64- |         |
|                                                                 |               |            | 2.71)       | 2.32)       |         |
| Folic acid exposure in the 6-months before LMP until index date | 751 (2.77)    | 5,181      | 0.71 (0.66- | 0.69 (0.64- | < 0.001 |
|                                                                 |               | (3.86)     | 0.78)       | 0.75)       |         |
| Co-morbidities in the 12-month before LMP until index date      | 1,336 (4.92)  | 5,607      | 1.20 (1.13- | 1.19 (1.11- | < 0.001 |
| Hypertension                                                    | 1,022 (3.76)  | (4.17)     | 1.28)       | 1.27)       | 0.19    |
| Diabetes                                                        | 5,001 (18.46) | 4,957      | 0.99 (0.92- | 1.05 (0.98- | < 0.001 |
| Asthma                                                          | 1,467 (5.40)  | (3.69)     | 1.06)       | 1.14)       | 0.003   |
| Thyroid disorders                                               | 696 (2.56)    | 20,788     | 1.22 (1.18- | 1.18 (1.13- | < 0.001 |
| Tobacco dependence                                              | 258 (0.95)    | (15.48)    | 1.27)       | 1.22)       | 0.02    |
| Alcohol dependence                                              | 373 (1.37)    | 7,581      | 0.92 (0.87- | 0.91 (0.85- | 0.04    |
| Other drugs dependence                                          |               | (5.64)     | 0.98)       | 0.97)       |         |
|                                                                 |               | 2,381      | 1.44 (1.31- | 1.28 (1.16- |         |
|                                                                 |               | (1.77)     | 1.57)       | 1.42)       |         |
|                                                                 |               | 727 (0.54) | 1.73 (1.48- | 1.22 (1.03- |         |
|                                                                 |               | 1,227      | 2.01)       | 1.44)       |         |
|                                                                 |               | (0.91)     | 1.47 (1.30- | 1.15 (1.01- |         |
|                                                                 |               |            | 1.67)       | 1.32)       |         |
| Pregnancy follow-up by gynecologist or obstetrician             | 8,037 (29.60) | 58,943     | 0.52 (0.50- | 0.47 (0.45- | < 0.001 |
| In the 12-month before LMP                                      | 597 (2.2)     | (43.89)    | 0.54)       | 0.48)       | 0.95    |
| Prior childbirth                                                | 952 (3.51)    | 2,614      | 1.16 (1.06- | 1.00 (0.90- | < 0.001 |
| Prior planned/induced abortion                                  | 179 (0.66)    | (1.95)     | 1.28)       | 1.10)       | < 0.001 |
| Prior spontaneous abortion                                      |               | 3,307      | 1.46 (1.35- | 1.32 (1.22- |         |
|                                                                 |               | (2.46)     | 1.58)       | 1.43)       |         |
|                                                                 |               | 406 (0.30) | 2.08 (1.72- | 1.77 (1.46- |         |
|                                                                 |               |            | 2.51)       | 2.15)       |         |

<sup>a</sup>SSRI antidepressants included citalopram, escitalopram, fluoxetine, fluvoxamine, paroxetine and sertraline.

<sup>b</sup>SNRI antidepressants included desvenlafaxine, duloxetine and venlafaxine.

<sup>c</sup>Tricyclic antidepressants included amitriptyline, clomipramine, desipramine, doxepin, imipramine, nortriptyline and trimipramine.

<sup>d</sup>Other antidepressants included bupropion, buspirone, L-tryptophan, maprotiline, mirtazapine, trazodone, moclobemide and nefazodone.

<sup>e</sup>Typical antipsychotic agents included chlorpromazine, fluphenazine, flupentixol, haloperidol, loxapine, methotrimeprazine, pericyazine, perphenazine, pimozide, prochlorperazine, trifluoperazine and zuclopenthixol.

<sup>f</sup>Atypical antipsychotic agents included aripiprazole, clozapine, olanzapine, risperidone, quetiapine and ziprasidone.

**eTable 9.** Association Between Benzodiazepine Incident Exposure During Early Pregnancy and the Risk of Spontaneous Abortion Among Pregnancies of Women With Mood and Anxiety Disorders Diagnosis in the 12 Months Before LMP Until Index Date

| Characteristic                                                      | Spontaneous abortion<br>n=3,419 | Controls<br>n=12,533 | Odds Ratio (OR)  |                    | P-value |
|---------------------------------------------------------------------|---------------------------------|----------------------|------------------|--------------------|---------|
|                                                                     |                                 |                      | Crude<br>95%CI   | Adjusted<br>95% CI |         |
| Study medications exposure from LMP until index date                | 198 (5.79)                      | 372 (2.97)           | 3.24 (2.03-5.18) | 2.85 (1.72-4.72)   | <0.001  |
| Benzodiazepines (overall)                                           |                                 |                      |                  |                    |         |
| Antidepressants exposure from LMP until index date                  | 403 (11.79)                     | 1,245 (9.93)         | 1.29 (1.00-1.68) | 1.16 (0.87-1.54)   | 0.31    |
| SSRIs <sup>a</sup> alone                                            | 182 (5.32)                      | 563 (4.49)           | 1.68             | 1.54               | 0.88    |
| SNRIs <sup>b</sup> alone                                            | 26 (0.76)                       | 50 (0.40)            | 1.32 (0.87-2.01) | 1.04 (0.66-1.63)   | 0.22    |
| Tricyclics <sup>c</sup> alone                                       | 72 (2.11)                       | 119 (0.95)           | 2.01             | 1.63               | 0.39    |
| Others <sup>d</sup> alone                                           | 112 (3.28)                      | 274 (2.19)           | 1.46 (0.52-4.10) | 2.03 (0.66-6.28)   | 0.57    |
| Combined antidepressants                                            | 5 (0.15)                        |                      | 2.00 (0.99-4.05) | 1.40 (0.65-3.02)   | 0.27    |
| Antipsychotics exposure from LMP until index date                   | 160 (4.68)                      | 45 (0.36)            | 4.05             | 3.02               | 0.08    |
| Typical <sup>e</sup> alone                                          | 4 (0.12)                        | 366 (2.92)           | 1.82 (1.12-2.94) | 1.17 (0.69-1.98)   | 0.33    |
| Atypical <sup>f</sup> alone                                         |                                 | 16 (0.13)            |                  |                    |         |
| Combined antipsychotics                                             |                                 |                      | 0.45 (0.09-2.27) | 0.37 (0.07-2.16)   |         |
|                                                                     |                                 |                      | 1.74 (1.12-2.71) | 1.55 (0.94-2.54)   |         |
|                                                                     |                                 |                      | 0.62 (0.06-7.00) | 0.23 (0.01-4.74)   |         |
| Demographic characteristics at LMP                                  |                                 |                      |                  |                    |         |
| Maternal age (y)                                                    |                                 |                      |                  |                    |         |
| Less than 35                                                        | 2,705 (79.12)                   | 10,675 (85.18)       | 1.00             | 1.00               |         |
| 35-39                                                               | 501 (14.65)                     | 1,445 (11.53)        | 1.19 (0.95-1.50) | 1.37 (1.07-1.75)   | 0.01    |
| 40 or more                                                          | 213 (6.23)                      | 3,333 (26.59)        | 1.50             | 1.75               | 0.001   |
| Welfare recipient                                                   | 988 (28.90)                     | 10,461 (83.47)       | 2.12 (1.36-3.33) | 2.23 (1.38-3.61)   | 0.19    |
| Urban dweller                                                       | 2,859 (83.62)                   |                      | 1.23 (1.02-1.48) | 1.15 (0.93-1.41)   | 0.08    |
| Health care utilization in the 12-month before LMP until index date |                                 |                      |                  |                    |         |
| Emergency visit and/or hospitalization                              | 2,333 (68.24)                   | 8,055 (64.27)        | 1.28 (1.06-1.54) | 1.25 (1.01-1.55)   | 0.04    |
| Psychiatrist visit                                                  | 288 (8.42)                      | 921 (7.35)           | 1.32 (0.98-1.79) | 1.19 (0.86-1.66)   | 0.30    |
| General practitioner (GP) visits                                    | 1,473 (43.08)                   |                      |                  |                    |         |

|                                                                                                                                                                                                                                                                                                                                                                                                                                                                                                                                                                                                                                                                                                                                                                                                                                                                                                     |               |            |                  |                  |        |
|-----------------------------------------------------------------------------------------------------------------------------------------------------------------------------------------------------------------------------------------------------------------------------------------------------------------------------------------------------------------------------------------------------------------------------------------------------------------------------------------------------------------------------------------------------------------------------------------------------------------------------------------------------------------------------------------------------------------------------------------------------------------------------------------------------------------------------------------------------------------------------------------------------|---------------|------------|------------------|------------------|--------|
| 0                                                                                                                                                                                                                                                                                                                                                                                                                                                                                                                                                                                                                                                                                                                                                                                                                                                                                                   | 185 (5.41)    | 5,489      |                  |                  | 0.01   |
| 1-2                                                                                                                                                                                                                                                                                                                                                                                                                                                                                                                                                                                                                                                                                                                                                                                                                                                                                                 | 1,761 (51.51) | (43.80)    | 1.00             | 1.00             | 0.21   |
| 3 or more                                                                                                                                                                                                                                                                                                                                                                                                                                                                                                                                                                                                                                                                                                                                                                                                                                                                                           |               | 941 (7.51) | 0.43 (0.23-0.81) | 0.41 (0.21-0.81) |        |
| Number of other specialists visits                                                                                                                                                                                                                                                                                                                                                                                                                                                                                                                                                                                                                                                                                                                                                                                                                                                                  | 1,962 (57.39) | 6,103      |                  |                  |        |
| 0                                                                                                                                                                                                                                                                                                                                                                                                                                                                                                                                                                                                                                                                                                                                                                                                                                                                                                   | 292 (8.54)    | (48.70)    | 0.77 (0.44-1.37) | 0.68 (0.37-1.25) | 0.33   |
| 1                                                                                                                                                                                                                                                                                                                                                                                                                                                                                                                                                                                                                                                                                                                                                                                                                                                                                                   | 1,165 (34.07) |            |                  |                  | 0.03   |
| 2 or more                                                                                                                                                                                                                                                                                                                                                                                                                                                                                                                                                                                                                                                                                                                                                                                                                                                                                           |               | 7,440      | 1.00             | 1.00             |        |
|                                                                                                                                                                                                                                                                                                                                                                                                                                                                                                                                                                                                                                                                                                                                                                                                                                                                                                     |               | (59.36)    | 1.27 (0.92-1.75) | 1.19 (0.84-1.68) |        |
|                                                                                                                                                                                                                                                                                                                                                                                                                                                                                                                                                                                                                                                                                                                                                                                                                                                                                                     |               | 1,065      | 1.37 (1.07-1.75) | 1.37 (1.04-1.80) |        |
|                                                                                                                                                                                                                                                                                                                                                                                                                                                                                                                                                                                                                                                                                                                                                                                                                                                                                                     |               | (8.50)     |                  |                  |        |
|                                                                                                                                                                                                                                                                                                                                                                                                                                                                                                                                                                                                                                                                                                                                                                                                                                                                                                     |               | 4,028      |                  |                  |        |
|                                                                                                                                                                                                                                                                                                                                                                                                                                                                                                                                                                                                                                                                                                                                                                                                                                                                                                     |               | (32.14)    |                  |                  |        |
| ≥ one diagnostic of insomnia in the 12-month before LMP until index date                                                                                                                                                                                                                                                                                                                                                                                                                                                                                                                                                                                                                                                                                                                                                                                                                            | 7 (0.20)      | 17 (0.14)  | 0.67 (0.11-3.99) | 0.67 (0.10-4.62) | 0.68   |
| Folic acid exposure in the 6-months before LMP until index date                                                                                                                                                                                                                                                                                                                                                                                                                                                                                                                                                                                                                                                                                                                                                                                                                                     | 98 (2.87)     | 583 (4.65) | 0.61 (0.37-0.99) | 0.72 (0.43-1.20) | 0.20   |
| Co-morbidities in the 12-month before LMP until index date                                                                                                                                                                                                                                                                                                                                                                                                                                                                                                                                                                                                                                                                                                                                                                                                                                          | 241 (7.05)    | 741 (5.91) | 1.11 (0.80-1.55) | 1.17 (0.81-1.68) | 0.41   |
| Hypertension                                                                                                                                                                                                                                                                                                                                                                                                                                                                                                                                                                                                                                                                                                                                                                                                                                                                                        | 130 (3.80)    | 504 (4.02) | 1.55             | 1.68             | 0.04   |
| Diabetes                                                                                                                                                                                                                                                                                                                                                                                                                                                                                                                                                                                                                                                                                                                                                                                                                                                                                            | 915 (26.76)   | 2,843      | 0.69 (0.45-1.06) | 0.62 (0.40-0.98) | 0.38   |
| Asthma                                                                                                                                                                                                                                                                                                                                                                                                                                                                                                                                                                                                                                                                                                                                                                                                                                                                                              | 231 (6.76)    | (22.68)    | 1.06             | 0.98             | 0.52   |
| Thyroid disorders                                                                                                                                                                                                                                                                                                                                                                                                                                                                                                                                                                                                                                                                                                                                                                                                                                                                                   | 161 (4.71)    | 890 (7.10) | 1.22 (1.01-1.48) | 1.10 (0.89-1.36) | 0.69   |
| Tobacco dependence                                                                                                                                                                                                                                                                                                                                                                                                                                                                                                                                                                                                                                                                                                                                                                                                                                                                                  | 88 (2.57)     | 414 (3.30) | 1.48             | 1.36             | 0.63   |
| Alcohol dependence                                                                                                                                                                                                                                                                                                                                                                                                                                                                                                                                                                                                                                                                                                                                                                                                                                                                                  | 143 (4.18)    | 191 (1.52) | 0.90 (0.65-1.26) | 0.89 (0.63-1.27) | 0.95   |
| Other drugs dependence                                                                                                                                                                                                                                                                                                                                                                                                                                                                                                                                                                                                                                                                                                                                                                                                                                                                              |               | 408 (3.26) | 1.20 (0.80-1.82) | 1.10 (0.68-1.79) |        |
|                                                                                                                                                                                                                                                                                                                                                                                                                                                                                                                                                                                                                                                                                                                                                                                                                                                                                                     |               |            | 1.43 (0.78-2.62) | 1.20 (0.57-2.55) |        |
|                                                                                                                                                                                                                                                                                                                                                                                                                                                                                                                                                                                                                                                                                                                                                                                                                                                                                                     |               |            | 1.32 (0.83-2.09) | 0.98 (0.59-1.65) |        |
| Pregnancy follow-up by gynecologist or obstetrician                                                                                                                                                                                                                                                                                                                                                                                                                                                                                                                                                                                                                                                                                                                                                                                                                                                 | 1,053 (30.80) | 5,569      | 0.54 (0.45-0.65) | 0.51 (0.41-0.62) | <0.001 |
| Spontaneous abortion in the 12-month before LMP                                                                                                                                                                                                                                                                                                                                                                                                                                                                                                                                                                                                                                                                                                                                                                                                                                                     | 28 (0.82)     | (44.43)    | 2.00 (0.72-5.57) | 2.17 (0.73-6.39) | 0.16   |
| <sup>a</sup> SSRI antidepressants included citalopram, escitalopram, fluoxetine, fluvoxamine, paroxetine and sertraline.<br><sup>b</sup> SNRI antidepressants included desvenlafaxine, duloxetine and venlafaxine.<br><sup>c</sup> Tricyclic antidepressants included amitriptyline, clomipramine, desipramine, doxepin, imipramine, nortriptyline and trimipramine.<br><sup>d</sup> Other antidepressants included bupropion, buspirone, L-tryptophan, maprotiline, mirtazapine, trazodone, moclobemide and nefazodone.<br><sup>e</sup> Typical antipsychotic agents included chlorpromazine, fluphenazine, flupentixol, haloperidol, loxapine, methotrimeprazine, pericyazine, perphenazine, pimozide, prochlorperazine, trifluoperazine and zuclopenthixol.<br><sup>f</sup> Atypical antipsychotic agents included aripiprazole, clozapine, olanzapine, risperidone, quetiapine and ziprasidone. |               |            |                  |                  |        |

**eTable 10.** Association Between Benzodiazepine Incident Exposure During Early Pregnancy and the Risk of Spontaneous Abortion With Pregnancies of Women With Only 1 Prescription Filled Prior to Pregnancy Who Overlap the LMP Considered as Unexposed

| Characteristic                                                      | Spontaneous abortion<br>n=27,149 | Controls<br>n=134,305 | Odds Ratio (OR)  |                    | P-value |
|---------------------------------------------------------------------|----------------------------------|-----------------------|------------------|--------------------|---------|
|                                                                     |                                  |                       | Crude<br>95%CI   | Adjusted<br>95% CI |         |
| Study medications exposure from LMP until index date                | 321 (1.18)                       | 632 (0.47)            | 2.52 (2.18-2.91) | 1.97 (1.69-2.29)   | < 0.001 |
| Benzodiazepines (overall)                                           |                                  |                       |                  |                    |         |
| Antidepressants exposure from LMP until index date                  | 628 (2.31)                       | 1,897 (1.41)          | 1.64 (1.49-1.81) | 1.29 (1.16-1.43)   | < 0.001 |
| SSRIs <sup>a</sup> alone                                            | 289 (1.06)                       | 874 (0.65)            | 1.81             | 1.43               | < 0.001 |
| SNRIs <sup>b</sup> alone                                            | 129 (0.48)                       | 313 (0.23)            | 1.70 (1.47-1.97) | 1.30 (1.12-1.51)   | < 0.001 |
| Tricyclics <sup>c</sup> alone                                       | 136 (0.50)                       | 266 (0.20)            | 1.97             | 1.51               | 0.007   |
| Others <sup>d</sup> alone                                           | 146 (0.54)                       | 350 (0.26)            | 2.06 (1.67-2.57) | 1.81 (1.44-2.28)   |         |
| Combined antidepressants                                            | 22 (0.08)                        |                       | 2.48 (1.98-3.10) | 1.97 (1.56-2.48)   | 0.002   |
| Antipsychotics exposure from LMP until index date                   | 251 (0.92)                       | 191 (0.14)            | 3.10             | 2.48               | 0.006   |
| Typical <sup>e</sup> alone                                          | 4 (0.01)                         | 584 (0.43)            | 2.02 (1.64-2.49) | 1.35 (1.09-1.69)   | 0.47    |
| Atypical <sup>f</sup> alone                                         |                                  | 22 (0.02)             |                  |                    |         |
| Combined antipsychotics                                             |                                  |                       | 0.54 (0.34-0.85) | 0.47 (0.30-0.75)   |         |
|                                                                     |                                  |                       | 2.03 (1.73-2.38) | 1.28 (1.07-1.52)   |         |
|                                                                     |                                  |                       | 0.96 (0.28-3.28) | 0.63 (0.18-2.21)   |         |
| Demographic characteristics at LMP                                  |                                  |                       |                  |                    |         |
| Maternal age (y)                                                    |                                  |                       |                  |                    |         |
| Less than 35                                                        | 20,858                           | 113,292               | 1.00             | 1.00               |         |
| 35-39                                                               | (76.83)                          | (84.35)               | 1.38 (1.32-1.43) | 1.55 (1.49-1.61)   | < 0.001 |
| 40 or more                                                          | 4,337 (15.97)                    | 17,101 (12.73)        | 2.73 (2.57-2.90) | 3.10 (2.91-3.30)   | < 0.001 |
| Welfare recipient                                                   | 1,954 (7.20)                     |                       |                  |                    | < 0.001 |
| Urban dweller                                                       | 6,592 (24.28)                    | 3,912 (2.91)          | 1.16 (1.12-1.19) | 1.07 (1.03-1.10)   | 0.42    |
|                                                                     | 22,426 (82.60)                   | 29,112 (21.68)        | 1.00 (0.96-1.03) | 1.02 (0.98-1.05)   |         |
|                                                                     |                                  | 110,978 (82.63)       |                  |                    |         |
| Health care utilization in the 12-month before LMP until index date |                                  |                       |                  |                    |         |
| Emergency visit and/or hospitalization                              | 15,279 (56.28)                   | 70,872 (52.77)        | 1.15 (1.11-1.18) | 1.18 (1.14-1.22)   | < 0.001 |
| Psychiatrist visit                                                  | 365 (1.34)                       |                       |                  |                    | 0.33    |

|                                                                                                                                                                                                                                                                                                                                                                      |               |            |                  |                  |         |
|----------------------------------------------------------------------------------------------------------------------------------------------------------------------------------------------------------------------------------------------------------------------------------------------------------------------------------------------------------------------|---------------|------------|------------------|------------------|---------|
| General practitioner (GP) visits                                                                                                                                                                                                                                                                                                                                     |               |            |                  |                  |         |
| 0                                                                                                                                                                                                                                                                                                                                                                    | 14,192        | 1,210      | 1.52 (1.34-1.73) | 1.07 (0.94-1.22) | 0.44    |
| 1-2                                                                                                                                                                                                                                                                                                                                                                  | (52.27)       |            |                  |                  | < 0.001 |
| 3 or more                                                                                                                                                                                                                                                                                                                                                            | 3,885 (14.31) | 72,006     | 1.00             | 1.00             |         |
| Number of other specialists visits                                                                                                                                                                                                                                                                                                                                   | 9,072 (33.92) | (53.61)    | 1.05 (0.99-1.11) | 1.02 (0.97-1.08) | 0.26    |
| 0                                                                                                                                                                                                                                                                                                                                                                    |               | 22,281     |                  |                  |         |
| 1                                                                                                                                                                                                                                                                                                                                                                    | 17,239        | (16.59)    | 1.36 (1.29-1.43) | 1.17 (1.11-1.24) | 0.002   |
| 2 or more                                                                                                                                                                                                                                                                                                                                                            | (63.50)       | 40,018     |                  |                  |         |
|                                                                                                                                                                                                                                                                                                                                                                      | 2,273 (8.37)  | (29.30)    | 1.00             | 1.00             |         |
|                                                                                                                                                                                                                                                                                                                                                                      | 7,637 (28.13) | 86,772     | 0.98 (0.93-1.04) | 0.97 (0.91-1.02) |         |
|                                                                                                                                                                                                                                                                                                                                                                      |               | (64.61)    |                  |                  |         |
|                                                                                                                                                                                                                                                                                                                                                                      |               | 12,268     | 1.16 (1.11-1.20) | 1.07 (1.03-1.12) |         |
|                                                                                                                                                                                                                                                                                                                                                                      |               | (9.13)     |                  |                  |         |
|                                                                                                                                                                                                                                                                                                                                                                      |               | 35,265     |                  |                  |         |
|                                                                                                                                                                                                                                                                                                                                                                      |               | (26.26)    |                  |                  |         |
| ≥ one diagnostic in the 12-month before LMP until index date                                                                                                                                                                                                                                                                                                         | 2,681 (9.88)  | 10,475     | 1.38 (1.32-1.44) | 1.17 (1.11-1.22) | < 0.001 |
| Mood and anxiety disorders                                                                                                                                                                                                                                                                                                                                           | 15 (0.06)     | (7.80)     |                  |                  | 0.57    |
| Insomnia                                                                                                                                                                                                                                                                                                                                                             |               | 54 (0.04)  | 1.46 (0.79-2.71) | 1.21 (0.63-2.31) |         |
| Folic acid exposure in the 6-months before LMP until index date                                                                                                                                                                                                                                                                                                      | 751 (2.77)    | 5,181      | 0.71 (0.66-0.78) | 0.69 (0.64-0.76) | < 0.001 |
| Co-morbidities in the 12-month before LMP until index date                                                                                                                                                                                                                                                                                                           | 1,336 (4.92)  | 5,607      | 1.20 (1.13-1.28) | 1.18 (1.10-1.27) | < 0.001 |
| Hypertension                                                                                                                                                                                                                                                                                                                                                         | 1,022 (3.76)  | (4.17)     |                  |                  | 0.22    |
| Diabetes                                                                                                                                                                                                                                                                                                                                                             | 5,001 (18.46) | 4,957      | 0.99 (0.92-1.06) | 1.05 (0.97-1.13) | < 0.001 |
| Asthma                                                                                                                                                                                                                                                                                                                                                               | 1,467 (5.40)  | (3.69)     |                  |                  | 0.003   |
| Thyroid disorders                                                                                                                                                                                                                                                                                                                                                    | 696 (2.56)    | 20,788     | 1.22 (1.18-1.27) | 1.17 (1.13-1.22) | < 0.001 |
| Tobacco dependence                                                                                                                                                                                                                                                                                                                                                   | 258 (0.95)    | (15.48)    |                  |                  | 0.02    |
| Alcohol dependence                                                                                                                                                                                                                                                                                                                                                   | 373 (1.37)    | 7,581      | 0.92 (0.87-0.98) | 0.91 (0.85-0.97) | 0.04    |
| Other drugs dependence                                                                                                                                                                                                                                                                                                                                               |               | (5.64)     |                  |                  |         |
|                                                                                                                                                                                                                                                                                                                                                                      |               | 2,381      | 1.44 (1.31-1.57) | 1.28 (1.16-1.42) |         |
|                                                                                                                                                                                                                                                                                                                                                                      |               | (1.77)     |                  |                  |         |
|                                                                                                                                                                                                                                                                                                                                                                      |               | 727 (0.54) | 1.73 (1.48-2.01) | 1.22 (1.03-1.44) |         |
|                                                                                                                                                                                                                                                                                                                                                                      |               | (0.91)     | 1.47 (1.30-1.67) | 1.15 (1.01-1.32) |         |
| Pregnancy follow-up by gynecologist or obstetrician                                                                                                                                                                                                                                                                                                                  | 8,037 (29.60) | 58,943     | 0.52 (0.50-0.54) | 0.47 (0.45-0.48) | < 0.001 |
| Spontaneous abortion in the 12-month before LMP                                                                                                                                                                                                                                                                                                                      | 597 (2.2)     | (43.89)    |                  |                  | < 0.001 |
|                                                                                                                                                                                                                                                                                                                                                                      |               | 2,614      | 2.08 (1.72-2.51) | 1.78 (1.46-2.16) |         |
|                                                                                                                                                                                                                                                                                                                                                                      |               | (1.95)     |                  |                  |         |
| <sup>a</sup> SSRI antidepressants included citalopram, escitalopram, fluoxetine, fluvoxamine, paroxetine and sertraline.<br><sup>b</sup> SNRI antidepressants included desvenlafaxine, duloxetine and venlafaxine.<br><sup>c</sup> Tricyclic antidepressants included amitriptyline, clomipramine, desipramine, doxepin, imipramine, nortriptyline and trimipramine. |               |            |                  |                  |         |

<sup>d</sup>Other antidepressants included bupropion, buspirone, L-tryptophan, maprotiline, mirtazapine, trazodone, moclobemide and nefazodone.

<sup>e</sup>Typical antipsychotic agents included chlorpromazine, fluphenazine, flupentixol, haloperidol, loxapine, methotrimeprazine, pericyazine, perphenazine, pimozide, prochlorperazine, trifluoperazine and zuclopenthixol.

<sup>f</sup>Atypical antipsychotic agents included aripiprazole, clozapine, olanzapine, risperidone, quetiapine and ziprasidone.

| <b>eTable 11.</b> Association Between Benzodiazepine Incident Exposure During Early Pregnancy and the Risk of Spontaneous Abortion With Only Pregnancies of Women Who Filled 2 or More Prescription of Benzodiazepine Were Considered as Exposed |                                  |                       |                  |                    |         |
|--------------------------------------------------------------------------------------------------------------------------------------------------------------------------------------------------------------------------------------------------|----------------------------------|-----------------------|------------------|--------------------|---------|
| Characteristic                                                                                                                                                                                                                                   | Spontaneous abortion<br>n=27,149 | Controls<br>n=134,305 | Odds Ratio (OR)  |                    | P-value |
|                                                                                                                                                                                                                                                  |                                  |                       | Crude<br>95%CI   | Adjusted<br>95% CI |         |
| Study medications exposure from LMP until index date<br>Benzodiazepines (overall)                                                                                                                                                                | 101 (0.37)                       | 165 (0.12)            | 3.02 (2.32-3.92) | 1.89 (1.43-2.48)   | < 0.001 |
| Antidepressants exposure from LMP until index date                                                                                                                                                                                               | 628 (2.31)                       | 1,897 (1.41)          | 1.64 (1.49-1.81) | 1.31 (1.18-1.46)   | < 0.001 |
| SSRIs <sup>a</sup> alone                                                                                                                                                                                                                         | 289 (1.06)                       | 874 (0.65)            | 1.81             | 1.46               | < 0.001 |
| SNRIs <sup>b</sup> alone                                                                                                                                                                                                                         | 129 (0.48)                       | 313 (0.23)            | 1.70 (1.47-1.97) | 1.31 (1.13-1.52)   | < 0.001 |
| Tricyclics <sup>c</sup> alone                                                                                                                                                                                                                    | 136 (0.50)                       | 266 (0.20)            | 1.97             | 1.52               | 0.003   |
| Others <sup>d</sup> alone                                                                                                                                                                                                                        | 146 (0.54)                       | 350 (0.26)            | 2.06 (1.67-2.57) | 1.84 (1.47-2.31)   |         |
| Combined antidepressants                                                                                                                                                                                                                         | 22 (0.08)                        |                       | 2.48 (1.98-3.10) | 1.97 (1.56-2.48)   | 0.002   |
| Antipsychotics exposure from LMP until index date                                                                                                                                                                                                | 251 (0.92)                       | 191 (0.14)            | 3.10             | 2.48               | 0.008   |
| Typical <sup>e</sup> alone                                                                                                                                                                                                                       | 4 (0.01)                         | 584 (0.43)            | 2.02 (1.64-2.49) | 1.40 (1.12-1.74)   | 0.46    |
| Atypical <sup>f</sup> alone                                                                                                                                                                                                                      |                                  | 22 (0.02)             |                  |                    |         |
| Combined antipsychotics                                                                                                                                                                                                                          |                                  |                       | 0.54 (0.34-0.85) | 0.48 (0.30-0.76)   |         |
|                                                                                                                                                                                                                                                  |                                  |                       | 2.03 (1.73-2.38) | 1.26 (1.06-1.50)   |         |
|                                                                                                                                                                                                                                                  |                                  |                       | 0.96 (0.28-3.28) | 0.62 (0.18-2.18)   |         |
| Demographic characteristics at LMP                                                                                                                                                                                                               |                                  |                       |                  |                    |         |
| Maternal age (y)                                                                                                                                                                                                                                 |                                  |                       |                  |                    |         |
| Less than 35                                                                                                                                                                                                                                     | 20,858                           | 113,292               | 1.00             | 1.00               |         |
| 35-39                                                                                                                                                                                                                                            | (76.83)                          | (84.35)               | 1.38 (1.32-1.43) | 1.55 (1.49-1.61)   | < 0.001 |
| 40 or more                                                                                                                                                                                                                                       | 4,337 (15.97)                    | 17,101 (12.73)        | 2.73 (2.57-2.90) | 3.10 (2.91-3.30)   | < 0.001 |
| Welfare recipient                                                                                                                                                                                                                                | 1,954 (7.20)                     |                       |                  |                    | < 0.001 |
| Urban dweller                                                                                                                                                                                                                                    | 6,592 (24.28)                    | 3,912 (2.91)          | 1.16 (1.12-1.19) | 1.07 (1.03-1.11)   | 0.45    |
|                                                                                                                                                                                                                                                  | 22,426 (82.60)                   | 29,112 (21.68)        | 1.00 (0.96-1.03) | 1.02 (0.98-1.05)   |         |
| Health care utilization in the 12-month before LMP until index date                                                                                                                                                                              |                                  |                       |                  |                    |         |
| Emergency visit and/or hospitalization                                                                                                                                                                                                           | 15,279 (56.28)                   | 70,872 (52.77)        | 1.15 (1.11-1.18) | 1.18 (1.14-1.22)   | < 0.001 |
| Psychiatrist visit                                                                                                                                                                                                                               | 365 (1.34)                       |                       |                  |                    | 0.34    |



|                                                                                                                                                |               |            |             |             |         |
|------------------------------------------------------------------------------------------------------------------------------------------------|---------------|------------|-------------|-------------|---------|
| General practitioner (GP) visits                                                                                                               |               |            |             |             |         |
| 0                                                                                                                                              | 14,192        | 1,210      | 1.52 (1.34- | 1.07 (0.93- | 0.42    |
| 1-2                                                                                                                                            | (52.27)       | (0.90)     | 1.73)       | 1.22)       | < 0.001 |
| 3 or more                                                                                                                                      | 3,885 (14.31) | 72,006     | 1.00        | 1.00        |         |
| Number of other specialists visits                                                                                                             | 9,072 (33.92) | (53.61)    | 1.05 (0.99- | 1.02 (0.97- |         |
| 0                                                                                                                                              |               | 22,281     | 1.11)       | 1.08)       | 0.26    |
| 1                                                                                                                                              | 17,239        | (16.59)    | 1.36 (1.29- | 1.17 (1.11- | 0.002   |
| 2 or more                                                                                                                                      | (63.50)       | 40,018     | 1.43)       | 1.24)       |         |
|                                                                                                                                                | 2,273 (8.37)  | (29.30)    |             |             |         |
|                                                                                                                                                | 7,637 (28.13) |            | 1.00        | 1.00        |         |
|                                                                                                                                                |               | 86,772     | 0.98 (0.93- | 0.97 (0.91- |         |
|                                                                                                                                                |               | (64.61)    | 1.04)       | 1.03)       |         |
|                                                                                                                                                |               | 12,268     | 1.16 (1.11- | 1.07 (1.03- |         |
|                                                                                                                                                |               | (9.13)     | 1.20)       | 1.12)       |         |
|                                                                                                                                                |               | 35,265     |             |             |         |
|                                                                                                                                                |               | (26.26)    |             |             |         |
| ≥ one diagnostic in the 12-month before LMP until index date                                                                                   | 2,681 (9.88)  | 10,475     | 1.38 (1.32- | 1.17 (1.12- | < 0.001 |
| Mood and anxiety disorders                                                                                                                     | 15 (0.06)     | (7.80)     | 1.44)       | 1.24)       | 0.58    |
| Insomnia                                                                                                                                       |               | 54 (0.04)  | 1.46 (0.79- | 1.20 (0.63- |         |
|                                                                                                                                                |               |            | 2.71)       | 2.29)       |         |
| Folic acid exposure in the 6-months before LMP until index date                                                                                | 751 (2.77)    | 5,181      | 0.71 (0.66- | 0.70 (0.64- | < 0.001 |
|                                                                                                                                                |               | (3.86)     | 0.78)       | 0.76)       |         |
| Co-morbidities in the 12-month before LMP until index date                                                                                     |               |            |             |             |         |
| Hypertension                                                                                                                                   | 1,336 (4.92)  | 5,607      | 1.20 (1.13- | 1.18 (1.10- | < 0.001 |
| Diabetes                                                                                                                                       | 1,022 (3.76)  | (4.17)     | 1.28)       | 1.26)       | 0.21    |
| Asthma                                                                                                                                         | 5,001 (18.46) | 4,957      | 0.99 (0.92- | 1.05 (0.97- | < 0.001 |
| Thyroid disorders                                                                                                                              | 1,467 (5.40)  | (3.69)     | 1.06)       | 1.13)       | 0.003   |
| Tobacco dependence                                                                                                                             | 696 (2.56)    | 20,788     | 1.22 (1.18- | 1.18 (1.13- | < 0.001 |
| Alcohol dependence                                                                                                                             | 258 (0.95)    | (15.48)    | 1.27)       | 1.22)       | 0.02    |
| Other drugs dependence                                                                                                                         | 373 (1.37)    | 7,581      | 0.92 (0.87- | 0.91 (0.85- | 0.04    |
|                                                                                                                                                |               | (5.64)     | 0.98)       | 0.97)       |         |
|                                                                                                                                                |               | 2,381      | 1.44 (1.31- | 1.28 (1.16- |         |
|                                                                                                                                                |               | (1.77)     | 1.57)       | 1.42)       |         |
|                                                                                                                                                |               | 727 (0.54) | 1.73 (1.48- | 1.23 (1.04- |         |
|                                                                                                                                                |               | 1,227      | 2.01)       | 1.45)       |         |
|                                                                                                                                                |               | (0.91)     | 1.47 (1.30- | 1.13 (1.01- |         |
|                                                                                                                                                |               |            | 1.67)       | 1.33)       |         |
| Pregnancy follow-up by gynecologist or obstetrician                                                                                            | 8,037 (29.60) | 58,943     | 0.52 (0.50- | 0.47 (0.45- | < 0.001 |
| Spontaneous abortion in the 12-month before LMP                                                                                                | 597 (2.2)     | (43.89)    | 0.54)       | 0.48)       | < 0.001 |
|                                                                                                                                                |               | 2,614      | 2.08 (1.72- | 1.78 (1.46- |         |
|                                                                                                                                                |               | (1.95)     | 2.51)       | 2.16)       |         |
| <sup>a</sup> SSRI antidepressants included citalopram, escitalopram, fluoxetine, fluvoxamine, paroxetine and sertraline.                       |               |            |             |             |         |
| <sup>b</sup> SNRI antidepressants included desvenlafaxine, duloxetine and venlafaxine.                                                         |               |            |             |             |         |
| <sup>c</sup> Tricyclic antidepressants included amitriptyline, clomipramine, desipramine, doxepin, imipramine, nortriptyline and trimipramine. |               |            |             |             |         |

<sup>d</sup>Other antidepressants included bupropion, buspirone, L-tryptophan, maprotiline, mirtazapine, trazodone, moclobemide and nefazodone.

<sup>e</sup>Typical antipsychotic agents included chlorpromazine, fluphenazine, flupentixol, haloperidol, loxapine, methotrimeprazine, pericyazine, perphenazine, pimozide, prochlorperazine, trifluoperazine and zuclopenthixol.

<sup>f</sup>Atypical antipsychotic agents included aripiprazole, clozapine, olanzapine, risperidone, quetiapine and ziprasidone.

**eTable 12.** Association Between Benzodiazepine Incident Exposure During Early Pregnancy and the Risk of Spontaneous Abortion Removing Benzodiazepine Prescription Filled in the 7 Days Prior to the Index Date (Date of Spontaneous Abortion)

| Characteristic                                                                    | Spontaneous abortion<br>n=27,149 | Controls<br>n=134,305 | Odds Ratio (OR)  |                    | P-value |
|-----------------------------------------------------------------------------------|----------------------------------|-----------------------|------------------|--------------------|---------|
|                                                                                   |                                  |                       | Crude<br>95%CI   | Adjusted<br>95% CI |         |
| Study medications exposure from LMP until index date<br>Benzodiazepines (overall) | 324 (1.19)                       | 643 (0.48)            | 2.47 (2.15-2.89) | 1.89 (1.63-2.20)   | < 0.001 |
| Antidepressants exposure from LMP until index date                                | 628 (2.31)                       | 1,897 (1.41)          | 1.64 (1.49-1.81) | 1.29 (1.16-1.43)   | < 0.001 |
| SSRIs <sup>a</sup> alone                                                          | 129 (0.48)                       | 874 (0.65)            | 1.70 (1.47-1.97) | 1.30 (1.11-1.51)   | < 0.001 |
| SNRIs <sup>b</sup> alone                                                          | 136 (0.50)                       | 313 (0.23)            | 2.06 (1.67-2.57) | 1.82 (1.45-2.29)   | 0.007   |
| Tricyclics <sup>c</sup> alone                                                     | 146 (0.54)                       | 266 (0.20)            | 2.48 (1.98-3.10) | 1.95 (1.54-2.46)   | 0.002   |
| Others <sup>d</sup> alone                                                         | 22 (0.08)                        | 350 (0.26)            | 2.02 (1.64-2.49) | 1.36 (1.09-1.69)   | 0.009   |
| Combined antidepressants                                                          | 22 (0.08)                        | 350 (0.26)            | 0.54 (0.34-0.85) | 0.48 (0.30-0.76)   | 0.47    |
| Antipsychotics exposure from LMP until index date                                 | 251 (0.92)                       | 191 (0.14)            | 2.03 (1.73-2.38) | 1.26 (1.06-1.50)   |         |
| Typical <sup>e</sup> alone                                                        | 4 (0.01)                         | 584 (0.43)            | 0.96 (0.28-3.28) | 0.63 (0.18-2.20)   |         |
| Atypical <sup>f</sup> alone                                                       |                                  | 22 (0.02)             |                  |                    |         |
| Combined antipsychotics                                                           |                                  | 22 (0.02)             |                  |                    |         |
| Demographic characteristics at LMP                                                |                                  |                       |                  |                    |         |
| Maternal age (y)                                                                  |                                  |                       |                  |                    |         |
| Less than 35                                                                      | 20,858 (76.83)                   | 113,292 (84.35)       | 1.00             | 1.00               |         |
| 35-39                                                                             |                                  |                       | 1.38 (1.32-1.43) | 1.55 (1.49-1.61)   | < 0.001 |
| 40 or more                                                                        | 4,337 (15.97)                    | 17,101 (12.73)        | 2.73 (2.57-2.90) | 3.10 (2.91-3.30)   | < 0.001 |
| Welfare recipient                                                                 | 1,954 (7.20)                     | 3,912 (2.91)          | 1.16 (1.12-1.19) | 1.07 (1.03-1.10)   | 0.43    |
| Urban dweller                                                                     | 6,592 (24.28)                    | 29,112 (21.68)        | 1.00 (0.96-1.03) | 1.02 (0.98-1.05)   |         |
| Health care utilization in the 12-month before LMP until index date               |                                  |                       |                  |                    |         |
| Emergency visit and/or hospitalization                                            | 15,279 (56.28)                   | 70,872 (52.77)        | 1.15 (1.11-1.18) | 1.18 (1.14-1.22)   | < 0.001 |
| Psychiatrist visit                                                                | 365 (1.34)                       |                       |                  |                    | 0.34    |

|                                                                                                                                                |               |            |             |             |         |
|------------------------------------------------------------------------------------------------------------------------------------------------|---------------|------------|-------------|-------------|---------|
| General practitioner (GP) visits                                                                                                               |               |            |             |             |         |
| 0                                                                                                                                              | 14,192        | 1,210      | 1.52 (1.34- | 1.07 (0.93- | 0.43    |
| 1-2                                                                                                                                            | (52.27)       | (0.90)     | 1.73)       | 1.22)       | < 0.001 |
| 3 or more                                                                                                                                      | 3,885 (14.31) | 72,006     | 1.00        | 1.00        |         |
| Number of other specialists visits                                                                                                             | 9,072 (33.92) | (53.61)    | 1.05 (0.99- | 1.02 (0.97- |         |
| 0                                                                                                                                              |               | 22,281     | 1.11)       | 1.08)       | 0.26    |
| 1                                                                                                                                              | 17,239        | (16.59)    | 1.36 (1.29- | 1.17 (1.11- | 0.002   |
| 2 or more                                                                                                                                      | (63.50)       | 40,018     | 1.43)       | 1.24)       |         |
|                                                                                                                                                | 2,273 (8.37)  | (29.30)    |             |             |         |
|                                                                                                                                                | 7,637 (28.13) |            | 1.00        | 1.00        |         |
|                                                                                                                                                |               | 86,772     | 0.98 (0.93- | 0.97 (0.91- |         |
|                                                                                                                                                |               | (64.61)    | 1.04)       | 1.02)       |         |
|                                                                                                                                                |               | 12,268     | 1.16 (1.11- | 1.07 (1.03- |         |
|                                                                                                                                                |               | (9.13)     | 1.20)       | 1.12)       |         |
|                                                                                                                                                |               | 35,265     |             |             |         |
|                                                                                                                                                |               | (26.26)    |             |             |         |
| ≥ one diagnostic in the 12-month before LMP until index date                                                                                   | 2,681 (9.88)  | 10,475     | 1.38 (1.32- | 1.17 (1.11- | < 0.001 |
| Mood and anxiety disorders                                                                                                                     | 15 (0.06)     | (7.80)     | 1.44)       | 1.23)       | 0.56    |
| Insomnia                                                                                                                                       |               | 54 (0.04)  | 1.46 (0.79- | 1.21 (0.63- |         |
|                                                                                                                                                |               |            | 2.71)       | 2.31)       |         |
| Folic acid exposure in the 6-months before LMP until index date                                                                                | 751 (2.77)    | 5,181      | 0.71 (0.66- | 0.69 (0.64- | < 0.001 |
|                                                                                                                                                |               | (3.86)     | 0.78)       | 0.76)       |         |
| Co-morbidities in the 12-month before LMP until index date                                                                                     |               |            |             |             |         |
| Hypertension                                                                                                                                   | 1,336 (4.92)  | 5,607      | 1.20 (1.13- | 1.18 (1.10- | < 0.001 |
| Diabetes                                                                                                                                       | 1,022 (3.76)  | (4.17)     | 1.28)       | 1.27)       | 0.22    |
| Asthma                                                                                                                                         | 5,001 (18.46) | 4,957      | 0.99 (0.92- | 1.05 (0.97- | < 0.001 |
| Thyroid disorders                                                                                                                              | 1,467 (5.40)  | (3.69)     | 1.06)       | 1.13)       | 0.003   |
| Tobacco dependence                                                                                                                             | 696 (2.56)    | 20,788     | 1.22 (1.18- | 1.17 (1.13- | < 0.001 |
| Alcohol dependence                                                                                                                             | 258 (0.95)    | (15.48)    | 1.27)       | 1.22)       | 0.02    |
| Other drugs dependence                                                                                                                         | 373 (1.37)    | 7,581      | 0.92 (0.87- | 0.91 (0.85- | 0.04    |
|                                                                                                                                                |               | (5.64)     | 0.98)       | 0.97)       |         |
|                                                                                                                                                |               | 2,381      | 1.44 (1.31- | 1.28 (1.16- |         |
|                                                                                                                                                |               | (1.77)     | 1.57)       | 1.42)       |         |
|                                                                                                                                                |               | 727 (0.54) | 1.73 (1.48- | 1.22 (1.03- |         |
|                                                                                                                                                |               | 1,227      | 2.01)       | 1.44)       |         |
|                                                                                                                                                |               | (0.91)     | 1.47 (1.30- | 1.16 (1.01- |         |
|                                                                                                                                                |               |            | 1.67)       | 1.32)       |         |
| Pregnancy follow-up by gynecologist or obstetrician                                                                                            | 8,037 (29.60) | 58,943     | 0.52 (0.50- | 0.47 (0.45- | < 0.001 |
| Spontaneous abortion in the 12-month before LMP                                                                                                | 597 (2.2)     | (43.89)    | 0.54)       | 0.48)       | < 0.001 |
|                                                                                                                                                |               | 2,614      | 2.08 (1.72- | 1.78 (1.46- |         |
|                                                                                                                                                |               | (1.95)     | 2.51)       | 2.16)       |         |
| <sup>a</sup> SSRI antidepressants included citalopram, escitalopram, fluoxetine, fluvoxamine, paroxetine and sertraline.                       |               |            |             |             |         |
| <sup>b</sup> SNRI antidepressants included desvenlafaxine, duloxetine and venlafaxine.                                                         |               |            |             |             |         |
| <sup>c</sup> Tricyclic antidepressants included amitriptyline, clomipramine, desipramine, doxepin, imipramine, nortriptyline and trimipramine. |               |            |             |             |         |

<sup>d</sup>Other antidepressants included bupropion, buspirone, L-tryptophan, maprotiline, mirtazapine, trazodone, moclobemide and nefazodone.

<sup>e</sup>Typical antipsychotic agents included chlorpromazine, fluphenazine, flupentixol, haloperidol, loxapine, methotrimeprazine, pericyazine, perphenazine, pimozide, prochlorperazine, trifluoperazine and zuclopenthixol.

<sup>f</sup>Atypical antipsychotic agents included aripiprazole, clozapine, olanzapine, risperidone, quetiapine and ziprasidone.

| <b>eTable 13.</b> Association Between Benzodiazepine Incident Exposure During Early Pregnancy and the Risk of Spontaneous Abortion With the General Practitioner Visits Dichotomized Regarding the Purpose of Consultation (Mood and Anxiety Disorders vs Other Reasons) |                                  |                       |                  |                    |         |
|--------------------------------------------------------------------------------------------------------------------------------------------------------------------------------------------------------------------------------------------------------------------------|----------------------------------|-----------------------|------------------|--------------------|---------|
| Characteristic                                                                                                                                                                                                                                                           | Spontaneous abortion<br>n=27,149 | Controls<br>n=134,305 | Odds Ratio (OR)  |                    | P-value |
|                                                                                                                                                                                                                                                                          |                                  |                       | Crude<br>95%CI   | Adjusted<br>95% CI |         |
| Study medications exposure from LMP until index date                                                                                                                                                                                                                     | 375 (1.38)                       | 788 (0.59)            | 2.47 (2.15-2.89) | 1.83 (1.60-2.11)   | < 0.001 |
| Benzodiazepines (overall)                                                                                                                                                                                                                                                |                                  |                       |                  |                    |         |
| Antidepressants exposure from LMP until index date                                                                                                                                                                                                                       | 628 (2.31)                       | 1,897 (1.41)          | 1.64 (1.49-1.81) | 1.28 (1.15-1.43)   | < 0.001 |
| SSRIs <sup>a</sup> alone                                                                                                                                                                                                                                                 | 289 (1.06)                       | 874 (0.65)            | 1.81             | 1.43               | < 0.001 |
| SNRIs <sup>b</sup> alone                                                                                                                                                                                                                                                 | 129 (0.48)                       | 313 (0.23)            | 1.70 (1.47-1.97) | 1.29 (1.11-1.50)   | < 0.001 |
| Tricyclics <sup>c</sup> alone                                                                                                                                                                                                                                            | 136 (0.50)                       | 266 (0.20)            | 1.97             | 1.50               | 0.009   |
| Others <sup>d</sup> alone                                                                                                                                                                                                                                                | 146 (0.54)                       | 350 (0.26)            | 2.06 (1.67-2.57) | 1.82 (1.45-2.29)   |         |
| Combined antidepressants                                                                                                                                                                                                                                                 | 22 (0.08)                        |                       | 2.48 (1.98-3.10) | 1.94 (1.53-2.45)   | 0.001   |
| Antipsychotics exposure from LMP until index date                                                                                                                                                                                                                        | 251 (0.92)                       | 191 (0.14)            | 3.10             | 2.45               | 0.01    |
| Typical <sup>e</sup> alone                                                                                                                                                                                                                                               | 4 (0.01)                         | 584 (0.43)            | 2.02 (1.64-2.49) | 1.34 (1.09-1.67)   | 0.45    |
| Atypical <sup>f</sup> alone                                                                                                                                                                                                                                              |                                  | 22 (0.02)             |                  |                    |         |
| Combined antipsychotics                                                                                                                                                                                                                                                  |                                  |                       | 0.54 (0.34-0.85) | 0.47 (0.29-0.75)   |         |
|                                                                                                                                                                                                                                                                          |                                  |                       | 2.03 (1.73-2.38) | 1.25 (1.05-1.48)   |         |
|                                                                                                                                                                                                                                                                          |                                  |                       | 0.96 (0.28-3.28) | 0.62 (0.18-2.17)   |         |
| Demographic characteristics at LMP                                                                                                                                                                                                                                       |                                  |                       |                  |                    |         |
| Maternal age (y)                                                                                                                                                                                                                                                         |                                  |                       |                  |                    |         |
| Less than 35                                                                                                                                                                                                                                                             | 20,858                           | 113,292               | 1.00             | 1.00               |         |
| 35-39                                                                                                                                                                                                                                                                    | (76.83)                          | (84.35)               | 1.38 (1.32-1.43) | 1.55 (1.49-1.61)   | < 0.001 |
| 40 or more                                                                                                                                                                                                                                                               | 4,337 (15.97)                    | 17,101 (12.73)        | 2.73 (2.57-2.90) | 3.10 (2.91-3.30)   | < 0.001 |
| Welfare recipient                                                                                                                                                                                                                                                        | 1,954 (7.20)                     |                       |                  |                    | < 0.001 |
| Urban dweller                                                                                                                                                                                                                                                            | 6,592 (24.28)                    | 3,912 (2.91)          | 1.16 (1.12-1.19) | 1.07 (1.03-1.10)   | 0.41    |
|                                                                                                                                                                                                                                                                          | 22,426 (82.60)                   | 29,112 (21.68)        | 1.00 (0.96-1.03) | 1.02 (0.98-1.05)   |         |
| Health care utilization in the 12-month before LMP until index date                                                                                                                                                                                                      |                                  |                       |                  |                    |         |
| Emergency visit and/or hospitalization                                                                                                                                                                                                                                   | 15,279 (56.28)                   | 70,872 (52.77)        | 1.15 (1.11-1.18) | 1.18 (1.14-1.22)   | < 0.001 |
| Psychiatrist visit                                                                                                                                                                                                                                                       | 365 (1.34)                       |                       |                  |                    | 0.25    |

|                                                                 |                |                 |                  |                  |              |
|-----------------------------------------------------------------|----------------|-----------------|------------------|------------------|--------------|
| General practitioner (GP) visits for mood and anxiety disorders | 25,836 (95.16) | 1,210 (0.90)    | 1.52 (1.34-1.73) | 1.08 (0.95-1.24) | 0.31 < 0.001 |
| 0                                                               |                |                 |                  |                  |              |
| 1-2                                                             | 1,061 (3.91)   | 129,182 (96.19) | 1.00             | 1.00             |              |
| 3 or more                                                       | 252 (0.93)     | 4,174 (3.11)    | 0.77 (0.72-0.83) | 1.03 (0.97-1.09) | 0.22         |
| General practitioner (GP) visits for other reasons              | 15,256 (56.19) | 949 (0.71)      | 0.74 (0.64-0.85) | 1.18 (1.12-1.24) | 0.41         |
| 0                                                               |                |                 |                  |                  |              |
| 1-2                                                             | 3,967 (14.61)  | 76,193 (56.73)  | 1.00             | 1.00             | 0.27         |
| 3 or more                                                       | 7,926 (29.19)  | 12,268 (9.13)   | 1.06 (1.01-1.11) | 1.05 (0.95-1.16) | 0.002        |
| Number of other specialists visits                              | 17,239 (63.50) | 22,446 (16.71)  | 0.84 (0.80-0.88) | 0.93 (0.79-1.10) |              |
| 0                                                               |                |                 |                  |                  |              |
| 1                                                               | 2,273 (8.37)   | 35,666 (26.56)  | 1.00             | 1.00             |              |
| 2 or more                                                       | 7,637 (28.13)  | 86,772 (64.61)  | 0.98 (0.93-1.04) | 0.97 (0.91-1.03) |              |
|                                                                 |                | 12,268 (9.13)   | 1.16 (1.11-1.20) | 1.07 (1.03-1.12) |              |
|                                                                 |                | 35,265 (26.26)  |                  |                  |              |
| ≥ one diagnostic in the 12-month before LMP until index date    | 2,681 (9.88)   | 10,475 (7.80)   | 1.38 (1.32-1.44) | 1.21 (1.15-1.29) | < 0.001      |
| Mood and anxiety disorders                                      | 15 (0.06)      | 54 (0.04)       | 1.46 (0.79-2.71) | 1.22 (0.64-2.32) | 0.55         |
| Insomnia                                                        |                |                 |                  |                  |              |
| Folic acid exposure in the 6-months before LMP until index date | 751 (2.77)     | 5,181 (3.86)    | 0.71 (0.66-0.78) | 0.69 (0.64-0.75) | < 0.001      |
| Co-morbidities in the 12-month before LMP until index date      |                |                 |                  |                  |              |
| Hypertension                                                    | 1,336 (4.92)   | 5,607 (4.17)    | 1.20 (1.13-1.28) | 1.18 (1.11-1.27) | < 0.001      |
| Diabetes                                                        | 1,022 (3.76)   | 4,957 (3.69)    | 0.99 (0.92-1.06) | 1.05 (0.97-1.13) | 0.22         |
| Asthma                                                          | 5,001 (18.46)  | 20,788 (15.48)  | 1.22 (1.18-1.27) | 1.17 (1.13-1.22) | < 0.001      |
| Thyroid disorders                                               | 1,467 (5.40)   | 7,581 (5.64)    | 0.92 (0.87-0.98) | 0.91 (0.85-0.97) | 0.003        |
| Tobacco dependence                                              | 696 (2.56)     | 2,381 (1.77)    | 1.44 (1.31-1.57) | 1.28 (1.16-1.41) | < 0.001      |
| Alcohol dependence                                              | 258 (0.95)     | 727 (0.54)      | 1.73 (1.48-2.01) | 1.22 (1.03-1.44) | 0.02         |
| Other drugs dependence                                          | 373 (1.37)     | 1,227 (0.91)    | 1.47 (1.30-1.67) | 1.15 (1.01-1.32) | 0.04         |
| Pregnancy follow-up by gynecologist or obstetrician             | 8,037 (29.60)  | 58,943 (43.89)  | 0.52 (0.50-0.54) | 0.47 (0.45-0.48) | < 0.001      |
|                                                                 | 597 (2.2)      |                 |                  |                  | < 0.001      |

|                                                                                                                                                                                                                                                                                                                                                                                                                                                                                                                                                                                                                                                                                                                                                                                                                                                                                                                          |  |                 |                      |                      |  |
|--------------------------------------------------------------------------------------------------------------------------------------------------------------------------------------------------------------------------------------------------------------------------------------------------------------------------------------------------------------------------------------------------------------------------------------------------------------------------------------------------------------------------------------------------------------------------------------------------------------------------------------------------------------------------------------------------------------------------------------------------------------------------------------------------------------------------------------------------------------------------------------------------------------------------|--|-----------------|----------------------|----------------------|--|
| Spontaneous abortion in the 12-month before LMP                                                                                                                                                                                                                                                                                                                                                                                                                                                                                                                                                                                                                                                                                                                                                                                                                                                                          |  | 2,614<br>(1.95) | 2.08 (1.72-<br>2.51) | 1.78 (1.47-<br>2.16) |  |
| <p><sup>a</sup>SSRI antidepressants included citalopram, escitalopram, fluoxetine, fluvoxamine, paroxetine and sertraline.</p> <p><sup>b</sup>SNRI antidepressants included desvenlafaxine, duloxetine and venlafaxine.</p> <p><sup>c</sup>Tricyclic antidepressants included amitriptyline, clomipramine, desipramine, doxepin, imipramine, nortriptyline and trimipramine.</p> <p><sup>d</sup>Other antidepressants included bupropion, buspirone, L-tryptophan, maprotiline, mirtazapine, trazodone, moclobemide and nefazodone.</p> <p><sup>e</sup>Typical antipsychotic agents included chlorpromazine, fluphenazine, flupentixol, haloperidol, loxapine, methotrimeprazine, pericyazine, perphenazine, pimozide, prochlorperazine, trifluoperazine and zuclopenthixol.</p> <p><sup>f</sup>Atypical antipsychotic agents included aripiprazole, clozapine, olanzapine, risperidone, quetiapine and ziprasidone.</p> |  |                 |                      |                      |  |



**eTable 14.** Association Between Benzodiazepine Incident Exposure During Early Pregnancy and the Risk of Spontaneous Abortion With the New Definition of Mood and Anxiety Disorder Proposed by the Canadian Chronic Disease Surveillance System (CCDSS)

| Characteristic                                                      | Spontaneous abortion<br>n=27,149 | Controls<br>n=134,305 | Odds Ratio (OR)  |                    | P-value |
|---------------------------------------------------------------------|----------------------------------|-----------------------|------------------|--------------------|---------|
|                                                                     |                                  |                       | Crude<br>95%CI   | Adjusted<br>95% CI |         |
| Study medications exposure from LMP until index date                | 375 (1.38)                       | 788 (0.59)            | 2.47 (2.15-2.89) | 1.86 (1.62-2.14)   | < 0.001 |
| Benzodiazepines (overall)                                           |                                  |                       |                  |                    |         |
| Antidepressants exposure from LMP until index date                  | 628 (2.31)                       | 1,897 (1.41)          | 1.64 (1.49-1.81) | 1.30 (1.17-1.45)   | < 0.001 |
| SSRIs <sup>a</sup> alone                                            | 289 (1.06)                       | 874 (0.65)            | 1.81             | 1.45               | < 0.001 |
| SNRIs <sup>b</sup> alone                                            | 129 (0.48)                       | 313 (0.23)            | 1.70 (1.47-1.97) | 1.31 (1.12-1.52)   | < 0.001 |
| Tricyclics <sup>c</sup> alone                                       | 136 (0.50)                       | 266 (0.20)            | 1.97             | 1.52               | 0.005   |
| Others <sup>d</sup> alone                                           | 146 (0.54)                       | 350 (0.26)            | 2.06 (1.67-2.57) | 1.82 (1.45-2.29)   |         |
| Combined antidepressants                                            | 22 (0.08)                        |                       | 2.48 (1.98-3.10) | 1.97 (1.56-2.48)   | 0.001   |
| Antipsychotics exposure from LMP until index date                   | 251 (0.92)                       | 191 (0.14)            | 3.10             | 2.48               | 0.008   |
| Typical <sup>e</sup> alone                                          | 4 (0.01)                         | 584 (0.43)            | 2.02 (1.64-2.49) | 1.37 (1.10-1.71)   | 0.49    |
| Atypical <sup>f</sup> alone                                         |                                  | 22 (0.02)             |                  |                    |         |
| Combined antipsychotics                                             |                                  |                       | 0.54 (0.34-0.85) | 0.47 (0.29-0.75)   |         |
|                                                                     |                                  |                       | 2.03 (1.73-2.38) | 1.27 (1.07-1.51)   |         |
|                                                                     |                                  |                       | 0.96 (0.28-3.28) | 0.65 (0.19-2.26)   |         |
| Demographic characteristics at LMP                                  |                                  |                       |                  |                    |         |
| Maternal age (y)                                                    |                                  |                       |                  |                    |         |
| Less than 35                                                        | 20,858                           | 113,292               | 1.00             | 1.00               |         |
| 35-39                                                               | (76.83)                          | (84.35)               | 1.38 (1.32-1.43) | 1.55 (1.49-1.61)   | < 0.001 |
| 40 or more                                                          | 4,337 (15.97)                    | 17,101 (12.73)        | 2.73 (2.57-2.90) | 3.10 (2.91-3.30)   | < 0.001 |
| Welfare recipient                                                   | 1,954 (7.20)                     |                       |                  |                    | < 0.001 |
| Urban dweller                                                       | 6,592 (24.28)                    | 3,912 (2.91)          | 1.16 (1.12-1.19) | 1.07 (1.03-1.10)   | 0.41    |
|                                                                     | 22,426 (82.60)                   | 29,112 (21.68)        | 1.00 (0.96-1.03) | 1.02 (0.98-1.05)   |         |
| Health care utilization in the 12-month before LMP until index date | 15,279 (56.28)                   | 70,872 (52.77)        | 1.15 (1.11-1.18) | 1.18 (1.14-1.22)   | < 0.001 |
| Emergency visit and/or hospitalization                              |                                  |                       |                  |                    | 0.22    |
| Psychiatrist visit                                                  | 365 (1.34)                       |                       |                  |                    |         |

|                                                                                                                                                                                                                                                                                                                                                                      |               |            |             |             |         |
|----------------------------------------------------------------------------------------------------------------------------------------------------------------------------------------------------------------------------------------------------------------------------------------------------------------------------------------------------------------------|---------------|------------|-------------|-------------|---------|
| General practitioner (GP) visits                                                                                                                                                                                                                                                                                                                                     |               |            |             |             |         |
| 0                                                                                                                                                                                                                                                                                                                                                                    | 14,192        | 1,210      | 1.52 (1.34- | 1.09 (0.95- | 0.42    |
| 1-2                                                                                                                                                                                                                                                                                                                                                                  | (52.27)       | (0.90)     | 1.73)       | 1.24)       | < 0.001 |
| 3 or more                                                                                                                                                                                                                                                                                                                                                            | 3,885 (14.31) | 72,006     | 1.00        | 1.00        |         |
| Number of other specialists visits                                                                                                                                                                                                                                                                                                                                   | 9,072 (33.92) | (53.61)    | 1.05 (0.99- | 1.02 (0.97- |         |
| 0                                                                                                                                                                                                                                                                                                                                                                    |               | 22,281     | 1.11)       | 1.08)       | 0.24    |
| 1                                                                                                                                                                                                                                                                                                                                                                    | 17,239        | (16.59)    | 1.36 (1.29- | 1.18 (1.12- | 0.003   |
| 2 or more                                                                                                                                                                                                                                                                                                                                                            | (63.50)       | 40,018     | 1.43)       | 1.24)       |         |
|                                                                                                                                                                                                                                                                                                                                                                      | 2,273 (8.37)  | (29.30)    |             |             |         |
|                                                                                                                                                                                                                                                                                                                                                                      | 7,637 (28.13) |            | 1.00        | 1.00        |         |
|                                                                                                                                                                                                                                                                                                                                                                      |               | 86,772     | 0.98 (0.93- | 0.97 (0.91- |         |
|                                                                                                                                                                                                                                                                                                                                                                      |               | (64.61)    | 1.04)       | 1.02)       |         |
|                                                                                                                                                                                                                                                                                                                                                                      |               | 12,268     | 1.16 (1.11- | 1.07 (1.02- |         |
|                                                                                                                                                                                                                                                                                                                                                                      |               | (9.13)     | 1.20)       | 1.12)       |         |
|                                                                                                                                                                                                                                                                                                                                                                      |               | 35,265     |             |             |         |
|                                                                                                                                                                                                                                                                                                                                                                      |               | (26.26)    |             |             |         |
| ≥ one diagnostic in the 12-month before LMP until index date                                                                                                                                                                                                                                                                                                         | 3,172 (11.68) | 11,806     | 1.35 (1.29- | 1.13 (1.07- | < 0.001 |
| Mood and anxiety disorders (CCDSS definition)                                                                                                                                                                                                                                                                                                                        | 15 (0.06)     | (8.79)     | 1.41)       | 1.19)       | 0.55    |
| Insomnia                                                                                                                                                                                                                                                                                                                                                             |               | 54 (0.04)  | 1.46 (0.79- | 1.22 (0.64- |         |
|                                                                                                                                                                                                                                                                                                                                                                      |               |            | 2.71)       | 2.32)       |         |
| Folic acid exposure in the 6-months before LMP until index date                                                                                                                                                                                                                                                                                                      | 751 (2.77)    | 5,181      | 0.71 (0.66- | 0.69 (0.64- | < 0.001 |
|                                                                                                                                                                                                                                                                                                                                                                      |               | (3.86)     | 0.78)       | 0.76)       |         |
| Co-morbidities in the 12-month before LMP until index date                                                                                                                                                                                                                                                                                                           |               |            |             |             |         |
| Hypertension                                                                                                                                                                                                                                                                                                                                                         | 1,336 (4.92)  | 5,607      | 1.20 (1.13- | 1.18 (1.11- | < 0.001 |
| Diabetes                                                                                                                                                                                                                                                                                                                                                             | 1,022 (3.76)  | (4.17)     | 1.28)       | 1.27)       | 0.22    |
| Asthma                                                                                                                                                                                                                                                                                                                                                               | 5,001 (18.46) | 4,957      | 0.99 (0.92- | 1.05 (0.97- | < 0.001 |
| Thyroid disorders                                                                                                                                                                                                                                                                                                                                                    | 1,467 (5.40)  | (3.69)     | 1.06)       | 1.13)       | 0.003   |
| Tobacco dependence                                                                                                                                                                                                                                                                                                                                                   | 696 (2.56)    | 20,788     | 1.22 (1.18- | 1.18 (1.13- | < 0.001 |
| Alcohol dependence                                                                                                                                                                                                                                                                                                                                                   | 258 (0.95)    | (15.48)    | 1.27)       | 1.22)       | 0.02    |
| Other drugs dependence                                                                                                                                                                                                                                                                                                                                               | 373 (1.37)    | 7,581      | 0.92 (0.87- | 0.91 (0.85- | 0.04    |
|                                                                                                                                                                                                                                                                                                                                                                      |               | (5.64)     | 0.98)       | 0.97)       |         |
|                                                                                                                                                                                                                                                                                                                                                                      |               | 2,381      | 1.44 (1.31- | 1.28 (1.16- |         |
|                                                                                                                                                                                                                                                                                                                                                                      |               | (1.77)     | 1.57)       | 1.42)       |         |
|                                                                                                                                                                                                                                                                                                                                                                      |               | 727 (0.54) | 1.73 (1.48- | 1.22 (1.03- |         |
|                                                                                                                                                                                                                                                                                                                                                                      |               | 1,227      | 2.01)       | 1.44)       |         |
|                                                                                                                                                                                                                                                                                                                                                                      |               | (0.91)     | 1.47 (1.30- | 1.16 (1.01- |         |
|                                                                                                                                                                                                                                                                                                                                                                      |               |            | 1.67)       | 1.32)       |         |
| Pregnancy follow-up by gynecologist or obstetrician                                                                                                                                                                                                                                                                                                                  | 8,037 (29.60) | 58,943     | 0.52 (0.50- | 0.47 (0.45- | < 0.001 |
| Spontaneous abortion in the 12-month before LMP                                                                                                                                                                                                                                                                                                                      | 597 (2.2)     | (43.89)    | 0.54)       | 0.48)       | < 0.001 |
|                                                                                                                                                                                                                                                                                                                                                                      |               | 2,614      | 2.08 (1.72- | 1.78 (1.46- |         |
|                                                                                                                                                                                                                                                                                                                                                                      |               | (1.95)     | 2.51)       | 2.16)       |         |
| <sup>a</sup> SSRI antidepressants included citalopram, escitalopram, fluoxetine, fluvoxamine, paroxetine and sertraline.<br><sup>b</sup> SNRI antidepressants included desvenlafaxine, duloxetine and venlafaxine.<br><sup>c</sup> Tricyclic antidepressants included amitriptyline, clomipramine, desipramine, doxepin, imipramine, nortriptyline and trimipramine. |               |            |             |             |         |

<sup>d</sup>Other antidepressants included bupropion, buspirone, L-tryptophan, maprotiline, mirtazapine, trazodone, moclobemide and nefazodone.

<sup>e</sup>Typical antipsychotic agents included chlorpromazine, fluphenazine, flupentixol, haloperidol, loxapine, methotrimeprazine, pericyazine, perphenazine, pimozide, prochlorperazine, trifluoperazine and zuclopenthixol.

<sup>f</sup>Atypical antipsychotic agents included aripiprazole, clozapine, olanzapine, risperidone, quetiapine and ziprasidone.

122  
123
